# Supplementary material for: Critical Assessment of Geoengineering Strategies using ResponseTheory
Source: Copernicus journal article supplement (doi:10.5194/esd-2018-30), 2018-05-23
Supplement: Supplementary file [file esd-2018-30-AC1-supplement.pdf]

# Can We Use Linear Response Theory to Assess Geoengineering Strategies?

Tamás Bódai<sup>1,2</sup>, Valerio Lucarini<sup>1,2,3</sup>, and Frank Lunkeit<sup>3</sup>

<sup>1</sup>Centre for the Mathematics of Planet Earth, University of Reading, UK

<sup>2</sup>Department of Mathematics and Statistics, University of Reading, UK

<sup>3</sup>CEN, Meteorological Institute, University of Hamburg, Germany

**Correspondence:** T. Bódai (t.bodai@reading.ac.uk)

**Abstract.** Geoengineering can control only some variables but not others, resulting in side-effects. We investigate in an intermediate-complexity climate model the applicability of linear response theory to assessing a geoengineering method. **The application of response theory for the assessment methodology that we are proposing is two-fold. First, as a new approach, (I) we wish to assess only the best possible geoengineering scenario for any given circumstances. This requires**

5 **solving** the following inverse problem. A given rise in carbon dioxide concentration  $[\text{CO}_2]$  would result in a global climate change with respect to an appropriate ensemble average of the surface air temperature  $\Delta\langle[T_s]\rangle$ . We are looking for a suitable modulation of solar forcing which can cancel out the said global change – **the only case that we will analyse here** – or modulate it in some other desired fashion. It is rather straightforward to predict this solar forcing, considering an infinite time period, by linear response theory in frequency-domain as:  $f_s(\omega) = (\Delta\langle[T_s]\rangle(\omega) - \chi_g(\omega)f_g(\omega))/\chi_s(\omega)$ , where the  $\chi$ 's are

10 linear susceptibilities; and we will spell out an iterative procedure suitable for numerical implementation that applies to finite time periods too. **Second, (II) to quantify side-effects using response theory, the response with respect to uncontrolled observables, such as regional averages  $\langle T_s \rangle$ , must of course be approximately linear.**

We find that under geoengineering **in the sense of (I)**, i.e. the combined greenhouse and **required** solar forcing, the response  $\Delta\langle[T_s]\rangle$  asymptotically is actually not zero. **This turns out to be not due to nonlinearity of the response under geoengi-**

15 **neering, but** that the linear susceptibilities  $\chi$  are not determined correctly. **The error** is in fact due to a significant quadratic nonlinearity of the response under system identification achieved by a forced experiment. This nonlinear contribution can be easily removed, which results in much better estimates of the linear susceptibility, and, in turn, in a five-fold reduction in  $\Delta\langle[T_s]\rangle$  under geoengineering. **This correction improves dramatically the agreement of the spatial patterns of the predicted linear and true model responses (that are actually consistent with the findings of previous studies). However, (II)**

20 **due to the nonlinearity of the response with respect to local quantities, e.g.  $\langle T_s \rangle$ , even under goengineering, the linear prediction is still erroneous. We find that in the examined model nonlinearities are stronger for precipitation compared to surface air temperature.**

## 1 Introduction

Geoengineering concepts with the purpose of ameliorating climate change are receiving nowadays increasing attention (Allen et al., 2014; National Research Council, a, b) (<http://www.ce-conference.org/>) because of the potential for an enormous gain, namely, fixing one of the greatest societal challenges primarily of a diplomatic nature, but also because of the great risk that such an unprecedented endeavour entails. However, the body of the presently available scientific analysis, albeit increasing (Lenton and Vaughan, 2013; Ferraro et al., 2014; Kravitz et al., 2011), is yet lacking the consideration of many more crucial aspects of the problem. For example, **the study of climate change in general would clearly benefit from** response theory (Kubo, 1966; Ruelle, 2009) and the theory of nonautonomous dynamical systems (Sell, 1967a, b; Romeiras et al., 1990; Crauel and Flandoli, 1994; Crauel et al., 1997; Arnold, 1998; Kloeden and Rasmussen, 2011; Carvalho et al., 2013). These mathematical tools, although having been introduced to climate science for decades (Leith, 1975; Bell, 1980; Nicolis et al., 1985), are far from being exhausted, still finding many applications of tackling problems in climate science in general (Cionni et al., 2004; Gritsun and Branstator, 2007; Kirk-Davidoff, 2009; Majda et al., 2010; Cooper et al., 2013; Lucarini and Sarno, 2011; Ragone et al., 2016; Lucarini et al., 2017; Herein et al., 2015, 2017; Bódai and Tél, 2012; Drótos et al., 2015, 2016). **The pioneering work that applies response theory to the study and efficient assessment of geoengineering in particular is due to MacMartin and Kravitz (2016). It concerns our point (II) only, and only regarding global averages. However, the regional temperature response to radiative forcing can be nonlinear (Winton, 2013; Good et al., 2015; Lucarini et al., 2017), and so it is not clear if it can be nonlinear under geoengineering too.** In the following we summarise briefly the existing mathematical tools (Sec. 1.1), and then frame the geoengineering problem as an inverse problem (I) **and provide the context for the need of assessing geoengineering strategies (II)** (Sec. 1.2).

### 1.1 Elements of response theory

In *nonautonomous dissipative dynamical systems*, like the climate system, given in the form

$$\dot{x} = F(x) + \epsilon g(x, t) \tag{1}$$

the *response* of the system to an external forcing  $f(t)$  can be *unambiguously* defined in terms of the so-called *snapshot attractor* (Romeiras et al., 1990) of the system, and the natural probability distribution or the measure  $\mu(x, t)$  supported by it. Both the attractor and the measure are *unique* objects; they are defined by an *ensemble* of trajectories initialized in the *infinite* past. The time-dependence of the snapshot attractor, also called a pullback attractor (Crauel and Flandoli, 1994; Arnold, 1998; Chekroun et al., 2011), and its measure give what is often termed as the ‘forced response’ (<https://www.gfdl.noaa.gov/blogheld/3-transient-vs-equilibrium-climate-responses/>), and the ‘geometrical details’ of theirs at any instant describe (statistical aspects of) the *internal variability* in a conceptually sound sense (Drótos et al., 2015).

For a scalar observable  $\Psi(x)$  too the (forced) response is uniquely given by a projection of the measure. **Response theory (Risken, 1996; Abramov and Majda, 2008; Ruelle, 2009) asserts that the most basic ensemble-based statistics, the**

mean  $\langle \Psi \rangle(t) = \int \mathbf{d}x \Psi(x) \mu(xt)$  can be decomposed into linear ( $j = 1$ ) and nonlinear ( $j > 1$ ) contributions:

$$\Delta \langle \Psi \rangle(t) = \langle \Psi \rangle(t) - \langle \Psi \rangle_0 = \sum_{j=1}^{\infty} \epsilon^j \langle \Psi \rangle^{(j)}(t), \quad (2)$$

where the first-order, i.e., linear, term can be obtained as:

$$\langle \Psi \rangle^{(1)}(t) = \int \mathbf{d}x \Psi(x) \int_{-\infty}^{\infty} \mathbf{d}\tau (\exp[(t - \tau)L_F(x)][L_g(x, \tau)\bar{\mu}(x)])(x, t, \tau), \quad (3)$$

- 5 where  $\bar{\mu}(x)$  is the natural invariant measure/probability distribution of the autonomous system ( $g = 0$ ), and the operators are defined as  $L_F \mu = -\text{div}(F\mu)$  and  $L_g \bar{\mu} = -\text{div}(g\bar{\mu})$ . In (2)  $\langle \Psi \rangle_0$  is the unperturbed ( $\epsilon = 0$ ) expectation; and the series converges only if the forcing  $\epsilon g(x, t)$  is small enough. If the forcing depends on time in a multiplicative way,  $g(x, t) = g(x)f(t)$ , then we can write that

$$\langle \Psi \rangle^{(1)}(t) = G_{\Psi}^{(1)}(t) * f(t) = \int_{-\infty}^{\infty} \mathbf{d}\tau G_{\Psi}^{(1)}(\tau) f(t - \tau), \quad (4)$$

- 10 where the Green's function is implied by Eqs. (3,4) to be

$$G_{\Psi}^{(1)}(t) = \int \mathbf{d}x \Psi(x) (\exp[tL_F(x)][L_g(x)\bar{\mu}(x)])(x, t). \quad (5)$$

Note that the higher-order terms  $\langle \Psi \rangle^{(j)}$  can be expressed as multiple *convolution integrals* involving multi-time Green's functions (Lucarini et al., 2017).

- The convolution integral under (4) can be *interpreted* in a way that the forcing  $f(t)$  is decomposed into an infinite sequence of  
15 impulses, whereby the responses of the different impulses – that can be superimposed – are all given by the Green's function, whose first nonzero values occur at the time of the corresponding impulses. Although a single such *finite* impulse does not produce a nonzero response, a *continuous* sequence apparently can. Or, a single impulse of infinite magnitude, formally a Dirac delta, can also produce a response, which is clearly the Green's function itself. If the continuous train of finite impulses all have the same unit magnitude, thereby forming a step function, formally the Heaviside step function  $\Theta(t)$ , the response  
20 is just the integral of the Green's function. Conversely, the Green's function is the derivative of the response to a unit step function. The latter prompts a numerical way of determining the Green's function, while a Dirac delta forcing is not realisable numerically.

Taking the Fourier transform (FT) of Eq. (4) we have, via the convolution theorem (Katznelson, 1976), a response formula in frequency domain:

$$25 \quad \langle \Psi \rangle^{(1)}(\omega) = \chi_{\Psi}^{(1)}(\omega) f(\omega), \quad (6)$$

where  $\chi_{\Psi}^{(1)}(\omega) = \text{FT}[G_{\Psi}^{(1)}(t)]$  is called the linear *susceptibility*. This equation looks more useful for practical purposes as it dictates a simple multiplication instead of evaluating a convolution integral. However, in Sec. 2.1 we explain why this is not the case, which is of course to do with the transformations between time and frequency domains.

## 1.2 The geoengineering problem

It has been proposed (National Research Council, b) that the effect of greenhouse forcing can be mitigated by applying another external forcing to the Earth system, by some geoengineering means, that has, in a way, an ‘opposing’ effect. There are various forcing types that can achieve this, but we will consider those – **generically refereed to as “solar-radiation management” (Ricke et al., 2010, 2012)** – that can be modeled by a modulation of the solar constant. We will call this simply the “solar forcing”. Clearly, these are means that modulate the shortwave incoming radiation. Readily proposed geoengineering methods include: a fleet of reflective satellites of large Sun-facing surface area put into orbit around Earth, aerosols sprayed into the atmosphere, artificially generated clouds, etc. A modulated solar constant model represents these geoengineering scenarios with a various degree of approximation, **not necessarily a good approximation (Ferraro et al., 2014)**.

Formally, the problem involves a forced/nonautonomous system, where at least two terms contribute to the forcing. For simplicity, we consider the case of only two forcing terms, and that they are both additive:

$$\dot{x} = F(x) + \epsilon(g_g(x)f_g(t) + g_s(x)f_s(t)), \quad (7)$$

where the subscripts indicate already the physical means of the forcings; ‘g’ for ‘greenhouse’ and ‘s’ for ‘solar’. Also, it is up to us to assign a value to the “small” parameter  $\epsilon$ , and in order to obtain a result in the uncomplicated form of (10), we choose the same  $\epsilon$  for both forcing components. **Eq. (3) implies that** the first-order contribution  $\langle \Psi_\Sigma \rangle^{(1)}(t)$  of the *total response*  $\Delta \langle \Psi_\Sigma \rangle$  under combined forcing, i.e., geoengineering, can be written as the superposition of first-order contributions of respective responses to the two forcings in two separate scenarios when these forcings are acting alone:

$$\langle \Psi_\Sigma \rangle^{(1)}(t) = G_{\Psi,g}^{(1)}(t) * f_g(t) + G_{\Psi,s}^{(1)}(t) * f_s(t), \quad (8)$$

whose FT is of course

$$\langle \Psi_\Sigma \rangle^{(1)}(\omega) = \chi_{\Psi,g}(\omega)f_g(\omega) + \chi_{\Psi,s}(\omega)f_s(\omega). \quad (9)$$

Note that the nonlinear response is more complicated with multiple forcings present than a sum of multiple convolution integrals (Lucarini et al., 2017) as in the single forcing scenario.

If the ‘forward’ problem is the prediction of the response under a given forcing, then the *inverse* problem of ‘predicting’ the necessary forcing for a desired response seems to be well-defined in view of the above equations. To a linear approximation the necessary or required forcing is:

$$f_s(\omega) \approx \frac{\Delta \langle \Psi_\Sigma \rangle(\omega) - \chi_{\Psi,g}(\omega)f_g(\omega)}{\chi_{\Psi,s}(\omega)}. \quad (10)$$

For the above  $\epsilon = 1$  is taken. We continue to discuss the solution of the inverse problem in Sec. 2.3, including the situation when a finite time period is considered. That situation can be interpreted as a control problem, which is in fact a rather special type of *optimal* control. This way the required forcing can be ‘predetermined’ which need not be updated during its application.

We note that this is the first time the so-called solar-radiation management (SRM) is formulated as the solution of an inverse

problem. In e.g. (Ricke et al., 2010, 2012) the solar forcing was constructed on the basis of some models of how much radiative forcing a sudden change of some greenhouse gas concentration or the stratospheric optical depth would yield. In addition, a scenario ensemble of SRMs was created, and a selection of the most effective SRMs was made. **The latter assessment strategy is clearly rather inefficient and inaccurate, which would still be the case had the ensemble been generated**

## 5 using response theory.

The inverse/control problem would have a ‘direct’ practical relevance had we got  $f_g(t)$  a given, as assumed. However, this is clearly not the case; predicting the greenhouse gas emissions is an extremely complicated and rather daunting task, as it is determined among others by *social* processes, for which we do not have good models. Nevertheless, efforts are underway (<https://crescendoproject.eu/research/theme-4/>). The current standard practice to ‘deal’ with this challenge, as reflected by the IPCC reports (Allen et al., 2014), is considering half a dozen ‘methodologically constructed’ 21st century emission scenarios. This way, instead of climate predictions one produces so-called climate *projections* belonging to hypothetical future emission scenarios. Therefore, the solution to our inverse problem has a rather *indirect* practical relevance; we can carry out at least *scenario analyses*. The reader can find elsewhere (MacMartin et al., 2014b, c, a; Kravitz et al., 2016) the description and analysis of a *feedback* control problem of *direct* practical relevance, when the solar forcing is being determined ‘on the fly’ with the use of some controller, adapting to a progressing greenhouse forcing, trying to realise the desired response *approximately*. Note that under feedback control, in a scenario analysis setting, a new simulation needs to be run for each emission scenario, **making it very inefficient for an extensive assessment exercise.**

We point out that in e.g. Eq. (10) we write  $\Psi$  denoting a generic observable. This means that we can *choose* a particular (scalar) observable which we desire to evolve in a particular way. With a reference to the classic term of ‘global warming’, in contrast with ‘climate change’, we will attempt to enforce the cancellation of the global average surface air temperature (Sec. 3.1). With the increasingly wide-ranging analyses of climate change scenarios, however, it is clear that ‘climate change’ should have a comprehensive meaning, not just a synonym for ‘global warming’ (Conway, 5 December 2008). In fact, physical quantities other than temperature could have a larger social or ecological impact (Allen et al., 2014). Beside the *physical type* of the observable quantity, we can have different choices with respect to the *spatial scale* of the quantity, such as local, or regional (Sec. 3.1.3), zonal (Sec. 3.1.2), global (Sec. 3.1.1), etc. averages.

Once an observable  $\Psi$  is chosen to evolve in a particular way, **which determines  $f_s(t)$  according to (10)**, the evolution of any other observable  $\Phi$  will be *a given* – the solution of a *forward* problem formally identical to (9):

$$\langle \Phi_{\Sigma} \rangle^{(1)}(t) = G_{\Phi,g}^{(1)}(t) * f_g(t) + G_{\Phi,s}^{(1)}(t) * f_s(t), \quad (11)$$

with  $f_s$  given, of course, by (10). Clearly,  $\langle \Phi_{\Sigma} \rangle^{(1)}(t) \neq \langle \Psi_{\Sigma} \rangle^{(1)}(t)$  when  $G_{\Phi,g}(t) \neq G_{\Psi,g}(t)$  and/or  $G_{\Phi,s}(t) \neq G_{\Psi,s}(t)$ , which is the generic case. Regarding the desire of cancellation  $\Delta \langle \Psi_{\Sigma} \rangle = 0$ , we can frame geoengineering – considering for simplicity only quasistatically slow changes  $f_g(t)$  – as a confinement to the 0 isoline of  $\Delta \langle \Psi_{\Sigma} \rangle$  over the plane of  $f_g$  and  $f_s$  (Lucarini, 2013). In general, this isoline is different for different observables  $\Phi \neq \Psi$ , that is, under linear response these straight isolines fan out of the origin of the  $f_g$ - $f_s$  plane. This is illustrated in Fig. 1, where the curvature of the isolines for larger values of  $f_g$  and  $f_s$  reflect also the more general situation of nonlinear responses. It is implied then that when the system is confined

to one isoline, it can obviously not be confined to the different isolines of other variables  $\Phi_i$ ; that is, (unwanted) changes  $\Delta\langle\Phi_{i,\Sigma}\rangle \neq 0$  will ensue. In other words: the proposed geoengineering method will provide just a partial solution at best. While one aspect of the problem is solved, other aspects can be neglected, or even changed to the worse, possibly with catastrophic consequences.<sup>1</sup> **A long list of studies have to date addressed the issue of side-effects; see e.g. (Ricke et al., 2010, 2012; Ferraro et al., 2014; MacMartin et al., 2014a; Kravitz et al., 2013; MacMartin and Kravitz, 2016; MacMartin et al., 2018).** This possibility is the main *motivation* of our present investigation **too, concerning in particular the question (II) if response theory can provide an efficient tool to map out and quantify accurately the various side-effects of a variety of geoengineering scenarios given a variety of emission scenarios in various Earth System Models.** Having enforced (approximately, to various degrees) a cancellation of global average surface air temperature,  $\Delta\langle\Psi_{\Sigma}\rangle = \Delta\langle[T_{s,\Sigma}]\rangle \approx 0$ , we will

10 *diagnose* unwanted changes (total response) in terms of:

- $\Phi = [T_s]_{\lambda}$  – zonal (Sec. 3.1.2) and
- $\Phi = T_s$  – regional averages on the surface, and
- $\Phi = T_{tr}$  – regional averages near the troposphere/tropopause (Sec. 3.1.3), and
- $\Phi = [P_y]$  and  $P_y$  – annual precipitation (Sec. 3.2).

15 Note that we denote spatial averaging by square brackets, subscripted by the spatial variable(s) with respect to which we average over its whole range, e.g. longitudes  $\lambda$  for zonal averages, and for areal/global averaging we drop the subscripting (instead of writing e.g.  $[T_s]_{\lambda,\mu}$ ). **Some of these observables have been considered in a number of studies (Ricke et al., 2010, 2012; Ferraro et al., 2014; Kravitz et al., 2013; MacMartin and Kravitz, 2016; MacMartin et al., 2018), and our results are mostly consistent with the published ones; however, we will also focus on whether these responses can be**

20 **predicted by response theory.**

We point out that **in the Planet Simulator intermediate-complexity GCM (Fraedrich, 2012), or PlaSim**, the greenhouse and solar forcings have been found approximately “equivalent” in terms of the stationary response of the global average surface air temperature (Boschi et al., 2013) insomuch that its isolines are parallel straight lines (even if there is a curvature of the surface). This was found to be the case in rather extensive ranges of the forcings, 1200-1500  $\text{Wm}^{-2}$  and 90-2880 ppm, respectively. That is, any curvature of the blue line as shown in Fig. 1 occurs outside of the said ranges. However, **to do with geoengineering the concern is** if these forcings are equivalent in the same sense in terms of other variables too, **as discussed. We will demonstrate in PlaSim that concerning regional averages  $T_s$  the correspondence of forcings is still remarkable, but there is nevertheless a residual response with a nontrivial pattern under geoengineering. Furthermore our analysis indicates that (II) this residual response is not so linear, and less so for precipitation, which goes beyond (MacMartin and**

---

<sup>1</sup>Furthermore, we note that, as it is often acknowledged, ‘no-one is living under the average climate’. Although, some live closer than others. That is, while the primary problem can be solved for some, even that will not be solved for others. Therefore, the debate on climate engineering is unlikely to have less political overtone and motive than the climate debate itself.

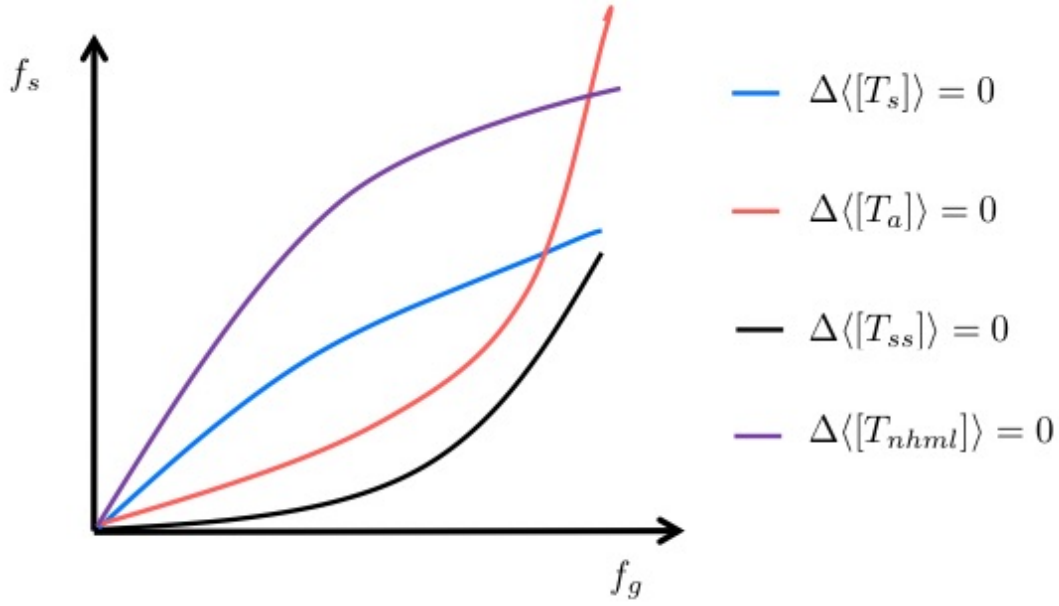

**Figure 1.** A cartoon of hypothetical isolines in the plane of greenhouse and solar forcings  $f_g$ - $f_s$  for various observables:  $\Delta\langle[T_s]\rangle = 0$  – globally averaged surface air temperature,  $\Delta\langle[T_a]\rangle = 0$  – globally averaged atmospheric temperature,  $\Delta\langle[T_{ss}]\rangle = 0$  – averaged sea surface temperature,  $\Delta\langle[T_{nhml}]\rangle = 0$  – surface air temperature averaged on the midlatitudes of the Northern hemisphere (reproduction of Fig. 5 of (Lucarini, 2013)).

**Kravitz, 2016) where the linearity of only the global average response under geoengineering is demonstrated clearly, but the linear prediction of spatial patterns were averaged over nine models.**

This work follows (Ragone et al., 2016) and (Lucarini et al., 2017). In the latter it has been demonstrated that response theory can predict spatial patterns, which, as outlined above, is one of the type of diagnostics that we use to assess the success of the geoengineering method. In both of these works the demonstrations were carried out on PlaSim (Fraedrich, 2012), but with slightly differing setups. Here we adopt the setup of (Lucarini et al., 2017) featuring meridional ocean heat transport. The present work also builds on (Gritsun and Lucarini, 2017) adopting a simple technique to obtain a better estimate of the linear susceptibility. **Clearly, a better susceptibility estimate would be useful in making a linear prediction only if the actual response is linear. While under  $[\text{CO}_2]$ -doubling (Ragone et al., 2016; Lucarini et al., 2017) found a nonlinear  $\Delta\langle[T_s]\rangle$  response, and so no linear prediction would be productive in that case, under geoengineering the total response is aimed to be much smaller, and so in principle the response may be linear. This is found to be the case in PlaSim approximately, and so (I) by improving the susceptibility estimates we can improve greatly on our prediction of a solar forcing  $f_s(t)$  required for cancellation  $\Delta\langle\Psi_\Sigma\rangle(t) = 0$ .**

We point out that the examined model PlaSim is lacking many realistic features, such as e.g. seasonal forcing or a deep ocean. The former deficiency results in very large global average surface temperature responses (Ragone et al., 2016), and the latter one does not allow for long time scales, typically of the order of hundred years. However, our technique is applicable in principle also to models with such long time scales. What is more, it would handle such situations powerfully given that any time *horizon* can be imposed on the analysis, constructing *transient* responses only, without the need of running very long experiments in which a new steady climate emerges upon external forcing. What makes this possible is that the Green’s function is needed to be determined up to times only up to which we want to determine the response, as indicated by Eq. (4).

We wish also to clarify that our analysis technique requires the estimation of the Green’s function, which is most straightforward to do by subjecting the system to external identification forcing (Sec. 2.2), which is clearly not possible in the case of Earth. Our analysis technique is intended rather for efficient scenario analyses in *models*, where the side-effects of interest of geoengineering can be calculated for any given emission scenario, choice of observable to control in a chosen model, using negligible computer resources. **For practicing geoengineering one would use a feedback control (MacMartin et al., 2014c, a) for which the Green’s function does not need to be determined while the objective should still be achieved rather accurately (even if the response was nonlinear). This practice would clearly be a “single shot”, a carefully deliberated and debated choice informed by a very extensive assessment. This is to say that the numerical efficiency concerns only the assessment not the practice of geoengineering. Of course it remains a problem that the relevant Green’s functions of Earth are not known accurately and we have to rely on different models for the assessment.**

The structure of the remainder is as follows. Next in Sec. 2 we detail our methodology: the notation and algorithm for spectral analysis in discrete time (Sec. 2.1), the way we obtain the Green’s functions (Sec. 2.2), our novel solution method to the inverse problem for a required solar forcing (Sec. 2.3), and a zoo of experiments used to assess nonlinearities and else (Sec. 2.4).<sup>2</sup> Then in Sec. 3 we provide results: firstly, pertaining to objective (I), about the success of the primary objective of geoengineering, the cancellation (Sec. 3.1.1), and then our diagnostics of other observables (Secs. 3.1.2, 3.1.3, 3.2). Finally, in Sec. 4, in terms of the stationary climate only, (I) we outline an improved method of obtaining the required solar forcing for cancellation, and also (II) **analyse our improved diagnostics with respect to the linearity of the response.** In Sec. 5 we summarize our results and give our perspective of worthwhile future work.

## 2 Methodology

### 2.1 Computing the response in time and frequency domains

To be able to carry out (approximate) calculations involving spectral transforms, we need to clarify the formulae and algorithms applicable to *discrete time* and *finite size* data. We can approximate the time-continuous strictly monotonically evolving forcing  $f(t)$  by a *staircase-like* forcing that is defined by a uniform *sampling* of  $f(t)$ , called a *sample-and-hold* approximation. It can be represented by a discrete sequence  $f[n] = f(t = nT)$ ,  $n = \dots, -1, 0, 1, \dots, T$  being the uniform sampling interval, in which

<sup>2</sup>The reader who is not concerned with computational aspects can skip Secs. 2.1, 2.2, 2.3. However, Sec. 2.4 is unavoidable in order to understand how the results presented subsequently will enable us to make conclusions regarding (II) the applicability of linear response theory.



sequence the data points provide the levels of the “steps”. That is, for an actual staircase-like forcing signal  $f(t = (n + \nu)T) = f[n]$  for all  $\nu \in [0, 1]$ , where the noninteger  $\nu$  can be viewed as a phase variable – the phase where the sample is taken within the interval where the forcing is constant. For such staircase-like forcings sample values of the response with the sampling  $\Psi[n] = \Psi(t = (n + \nu)T)$  at any phase  $\nu \in [0, 1]$  obey:

$$5 \quad \langle \hat{\Psi} \rangle^{(1)}[n] = \sum_{k=-\infty}^{\infty} h_{\Psi}[k] f[n-k] = h_{\Psi}[n] * f[n] \quad (12)$$

where the discrete-time (DT) impulse response or DT Green’s function  $h_{\Psi}[n]$  is, clearly, the response  $\langle \hat{\Psi}_{\perp} \rangle^{(1)}$  to a Kronecker delta function forcing:  $f[n] = \delta[n] = 1$  if  $n = 0$  and 0 otherwise (Hespanha, 2009). Note that we make a distinction in our notation with regard to the special forcing such that we distinguish  $\hat{\Psi}$  from  $\Psi$ ; however, for simplicity, we did not subscript  $\hat{\Psi}$  by  $\nu$  despite that it depends on the phase. Note also that in general  $h_{\Psi}[n] \neq G_{\Psi}^{(1)}[n] = G_{\Psi}^{(1)}(t = (n + \nu)T)$  with the same  $\nu$  as  $\Psi[n]$  (or  $\hat{\Psi}[n]$ ) is defined with, or with any  $\nu$  and all  $n$ . Clearly, once the sampling frequency is not adequate regarding some ‘strongly featured’ time scales of the forcing, the calculated discrete response will be also an inadequate approximation. We note further that – unlike the Dirac delta in the time-continuous case – the Kronecker delta *can* be realised for numerical purposes. It is equivalent to applying a step forcing and taking the difference:

$$h_{\Psi}[n] = \Delta \langle \hat{\Psi}_{\tau} \rangle[n] - \Delta \langle \hat{\Psi}_{\tau} \rangle[n-1]. \quad (13)$$

15 This method was used in (Lucarini et al., 2017). Such external forcings we will refer to as (system) identification forcing.

When facing the practical situation of having *finite* time series,  $f[l]$  and  $h_{\Psi}[l]$ ,  $l = 0, \dots, L-1$ , Eq. (5) of the Appendix can be used to determine the response  $h_{\Psi} * f[l]$ ,  $l = 0, \dots, L-1$  (whose usefulness is coming from efficient algorithms for evaluating the discrete Fourier transform, DFT; we evaluate the DFT using Matlab’s `fft`). To this end one can *pad*  $f[l]$  and  $h_{\Psi}[l]$  by  $L-1$  zeros in *front* (although mind footnote 11 of the Appendix; we will denote these padded sequences by e.g.  $\tilde{f}[l]$ ,  $l = 0, \dots, 2(L-1)$ ). The first useful ‘half’ ( $l = 0, \dots, L-2$ ) of the circular convolution  $\text{DFT}^{-1}\{\text{DFT}\{\tilde{h}_{\Psi}\}\text{DFT}\{\tilde{f}\}\}$  resulting from eq. (5) will then match the linear convolution  $h_{\Psi} * f[l]$ ,  $l = 0, \dots, L-1$ . Unlike this calculation in frequency-domain, the calculation in time-domain using Eq. (12) is straightforward.

## 2.2 Obtaining the Green’s function

First, in order to predict the response (to first order), we need to obtain e.g. the (first order) Green’s function. As Eq. (5) suggests it is ‘coded in’ the autonomous system. A direct evaluation of this formula is, however, prone to failure (Lucarini et al., 2017). Second, we note that in practice we can study only a discrete time version of the system. This prompts that for a direct way of determining the Green’s function, instead of Eq. (4) we have to use Eq. (12) (leading to Eq. (13)). It also means that we cannot infer the response of the system just by observing its autonomous dynamics, but we need to force it externally in a suitable way. Third, an ensemble of experiments (appropriately initialised) is needed to obtain the expected value  $\langle \hat{\Psi} \rangle$  (notation introduced in Sec. 2.1, first appearing in Eq. (12)). **This was acknowledged also by MacMartin and Kravitz (2016).** Clearly, only a finite number of experiments is feasible to run, so we obtain an approximation of  $\langle \hat{\Psi} \rangle$ , where the error is some correlated noise

process. This correlation can be negligible with an infrequent sampling allowed by, say, a slow forcing to be applied.<sup>3</sup> We use the data that was used for (Lucarini et al., 2017), which consist of some ensembles of 200 members, and we have produced new data belonging to new forcing scenarios, to be described in Sec. 2.4, that consist of ensembles of 20 members.

As already spelled out in Sec. 2.1, two identification forcing types are particularly suitable to determine the Green’s function; one is a step forcing, and the other is the Kronecker delta. When a random statistical error is present due to the finite ensemble size, represented say by a Gaussian random variable  $\xi$ , it is actually *better to use a Kronecker delta* forcing for the following reason. Using the step forcing one needs to take the difference of consecutive values – what is sometimes called ‘differencing’ – of the response sequence (13). This way at any time the variance of the error is that of the *difference* of two random variables,  $\xi_1$  and  $\xi_2$ , both distributed identically to the original random variable  $\xi$ . For Gaussian variables it is straightforward to show that  $\text{Var}[\xi_1 - \xi_2] = 2\text{Var}[\xi]$ . Note that we assume that  $\xi$  is the same random variable to a good approximation under the delta and step forcings.<sup>4</sup> Nevertheless, we apply a step forcing also in our new experiments, so that we are able to make use of data produced for (Lucarini et al., 2017) in a consistent manner. Examples of the response to step forcings are displayed in Fig. 2. The similarity of the responses to greenhouse and solar forcings here, and so the Green’s functions, is consistent with the findings of (Merlis et al., 2014; Caldeira and Myhrvold, 2013; MacMynowski et al., 2011) **and the design of the G2 GeoMIP experiment (Kravitz et al., 2011).**

It is important to appreciate the following trade-off. For a better signal-to-noise ratio one can apply a more powerful identification forcing. However, in the case of the presence of nonlinearities, the more powerful the forcing signal the larger the error in estimating the Green’s function *belonging to the base state*  $\langle \Psi \rangle_0$  (even without noise). **MacMartin and Kravitz (2016) applied a [CO<sub>2</sub>]-quadrupling (and it is a standard forcing level for geoengineering studies (Ferraro et al., 2014; Kravitz et al., 2011)), however, they determined the solar forcing for cancellation not via Green’s functions (Sec. 2.3), and checked the linearity of the response only up to a forcing level lower than [CO<sub>2</sub>]-doubling. Their motivation for applying the high forcing level seems to be only to be able to determine the Green’s function with a better SNR given that no ensemble data is available from the GeoMIP experiments.**

We make here two more comments on the issue with noise. First, instead of instantaneous samples of the observable  $\Psi$  and the corresponding Green’s function, we will consider, like in (Lucarini et al., 2017), *annual averages*,  $\bar{\Psi}[n] = \int_0^1 d\nu \Psi((n + \nu)T)$ . This is sensible given the slow rate of change that the applied forcing represents; and it also greatly reduces the noise level. In this regard we point out that annual averages too obey Eq. (12) *exactly* if the forcing is constant over a year, because the order of summations can be interchanged, whereby a well-defined DT Green’s function belonging to the annual average emerges. We will use only annually constant staircase-like forcings in our experiments (Sec. 2.4, ), so that it be clear that

<sup>3</sup>As noted in Sec. 2.1, the approximation  $\langle \Psi \rangle^{(1)}[n] \approx \langle \hat{\Psi} \rangle^{(1)}[n]$  – even with infinite ensemble size – is the better the better the forcing  $f$  is approximated by a staircase function with a certain sampling time  $T$ . Therefore, the larger  $T$ , the worse the approximation, and the more white as a noise the error with a finite ensemble size. However, it is not the whiteness of this noise is what matters but its magnitude, so there is not really an “accuracy vs whiteness” trade-off situation regarding the choice of  $T$ . However, shortly we discuss how a trade-off situation does arise regarding the choice of  $T$  concerning indeed the *magnitude* of the noise.

<sup>4</sup>Clearly, when the noise-like fluctuation is a genuine part of the response, the variance of these fluctuations are not the same under the two said types of the forcing.

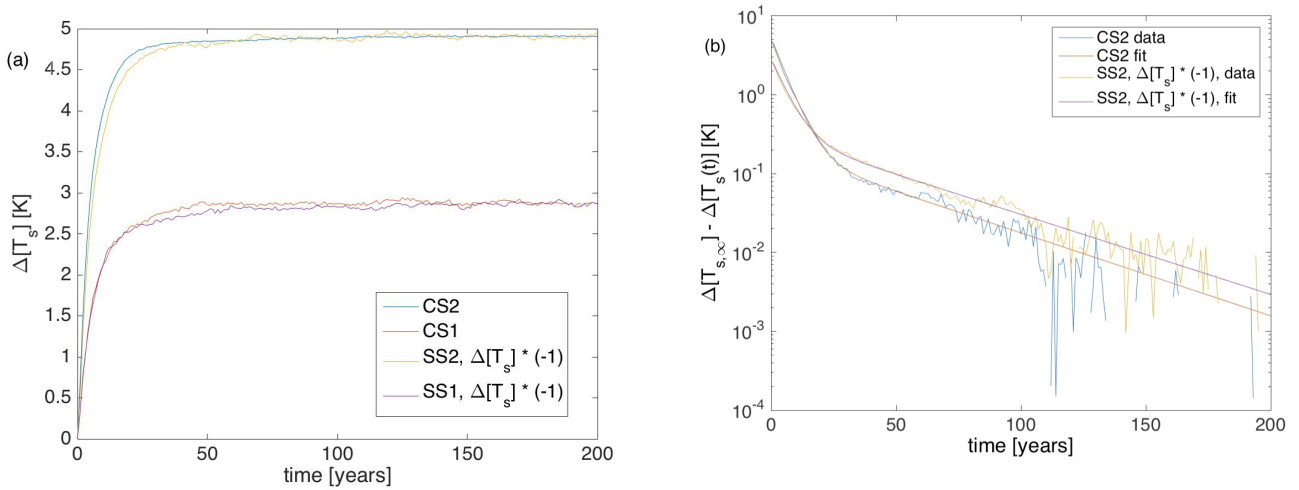

**Figure 2.** Simulated response to step forcings. The chosen observable is the global average surface air temperature  $[T_s]$ . The identification forcing scenarios are those of CS2, CS1, SS2, SS1 from Table 1. (a) After a subtraction of the limit value and displaying the response on lin-log scales (b), it is revealed that the high-dimensional system behaves very much like a noise-driven linear 2-box model, also called a vector autoregressive (VAR) model, in view of the considered global scale variable, **as also recognised by MacMynowski et al. (2011); Caldeira and Myhrvold (2013)**. The two time scales of the VAR models fitted to the CS2 and SS2 data are about 5 and 40 years. **The second time scale is in a disagreement with (MacMynowski et al., 2011) and it is not clear whether a more complex model is more reliable in this respect.** Note: the angle brackets denoting ensemble average are dropped from diagram annotations throughout the paper.

a linear prediction of the response has an error not because Eq. (12) does not apply exactly, but because of the missing higher order perturbative terms appearing in (2). Second, the said enhancement of noise by differencing in (13) cannot be overcome by working in frequency-domain. The Green's function, via frequency-domain applying Eq. (1), is expressed as  $h_\Psi = \text{DTFT}^{-1}\{\text{DTFT}\{\Delta\langle\hat{\Psi}_r\rangle\}/\text{DTFT}\{f_r\}\}$ , where  $1/\text{DTFT}\{f_r\} = 1 - e^{-i\omega}$ . The latter is the very factor arising in the DTFT of a differenced sequence. The only way that we are aware of to avoid the differencing and thereby reducing the noise is that by using a Kronecker delta identification forcing as argued above<sup>5</sup>.

### 2.3 The inverse problem

When different forcings act in the same time, their first-order contributions to the response – as discussed in Sec. 1.1 – can be *superimposed*. Hence, when we desire a certain total response  $\Delta\langle\Psi_\Sigma\rangle(t)$  to a *combined forcing* when all forcings are given but one, there is a *unique* form of that one required to fulfill our desire. In terms of the geoengineering problem of our interest (Sec. 1.2), the required solar forcing  $f_s$  in order to achieve a total response  $\Delta\langle\Psi_\Sigma\rangle$  given a greenhouse forcing  $f_g$

<sup>5</sup>There exist filtering techniques, but they introduce some assumptions either on the functional form of the Green's function (parametric techniques), or on the goodness of fit (nonparametric techniques) of their estimate to, say, one of the described straightforward (noisy) estimates (such as a minimal root-mean-square-error). One can use e.g. Matlab's `impzest`.

can be *expressed*, to a first-order approximation, in frequency-domain as stated under (10). With the most obvious choice of *cancellation*,  $\Delta\langle\Psi_\Sigma\rangle = 0$ , Eq. (10) simplifies to:

$$f_s(\omega) \approx -\frac{\chi_{\Psi,g}(\omega)}{\chi_{\Psi,s}(\omega)} f_g(\omega). \quad (14)$$

Note that the forcings are defined by (1) to have zero reference values belonging to  $\langle\Psi_\Sigma\rangle_0$ , and so there is no need to write  $\Delta$  in their notation. However, in practice when finite time series are available, the simplification is not so trivial. As described in the end of Sec. 2.1, in place of the FT's we have to calculate in Eq. (10) with  $\text{DFT}\{\tilde{f}_g\}$ ,  $\text{DFT}\{\tilde{h}_{\Psi,s}\}$  and  $\text{DFT}\{\tilde{h}_{\Psi,g}\}$ . Furthermore, the DFT in place of  $\Delta\langle\Psi_\Sigma\rangle(\omega)$  is that of a sequence  $\Delta\langle\tilde{\Psi}_\Sigma\rangle[l]$ , only the first useful ‘half’ ( $l = 0, \dots, L-2$ ) of which is zero, as dictated by our requirements, but its second half ( $l = L-1, \dots, 2(L-1)$ ) has nonzero values in general. These nonzero values characterize the total response to combined *step* forcings (to do with the ‘gap’ mentioned in the caption of Fig. 3), but also depend to a certain extent on the particular finite  $f_g[l]$  presented. The reason for this is that the Green’s function is given only up to a finite time, which becomes clear upon inspection of the workings of the convolution of finite time series. The said nonzero values are given of course by

$$\Delta\langle\tilde{\Psi}_\Sigma\rangle = \text{DFT}^{-1}\{\text{DFT}\{\tilde{h}_{\Psi,g}\}\text{DFT}\{\tilde{f}_g\} + \text{DFT}\{\tilde{h}_{\Psi,s}\}\text{DFT}\{\tilde{f}_s\}\}, \quad (15)$$

where, however,  $\tilde{f}_s$  is not known being the sought-for object. The idea is that we can look for  $\tilde{f}_s$  by an *iterative* procedure, which is initialised, say, by  $\tilde{f}_s = \tilde{f}_g$ . Note that if  $h_{\Psi,g}$  and  $h_{\Psi,s}$  are not dissimilar, nor are  $f_g$  and  $f_s$ ; that is, the initial value is not far from the solution, which gives hope that it is within the basin of attraction to the solution. In each iterate we

1. evaluate Eq. (15) using a current estimate of  $\tilde{f}_s$ , but replacing beforehand any nonzeros in the first half of that  $\tilde{f}_s$  by zeros;
2. in the resulting  $\Delta\langle\tilde{\Psi}_\Sigma\rangle[l]$  we replace any nonzeros in the *first* half by zeros in order to have it in the right form; and then
3. we get a new estimate for  $\tilde{f}_s$  using a formula analogous with Eq. (10).

Ideally, the first half of the  $\tilde{f}_s$  estimates in stage 3. converge to zero, and the second half to some nontrivial form that is the solution. In our experience (results not shown) this is the case for systems with fairly simple and smoothly varying Green’s functions. However, when the same Green’s functions are corrupted by noise, our experience is that the procedure does not necessarily converge, but iterates of  $\tilde{f}_s$  can develop increasingly large and in fact regular harmonic-looking oscillatory features. It is possible to achieve convergence for some smaller but nonzero noise level. However, even then the limit function retains small oscillatory features over the full length of  $\tilde{f}_s$ .

We emphasize that the iterative procedure was needed because we could not predict the second nonuseful half of  $\Delta\langle\tilde{\Psi}_\Sigma\rangle[l]$  since we do not have the Green’s functions in full but with a cutoff in time. This means that by running longer and longer *ensemble* simulations, by which we can determine the Green’s functions further and further in time, the solution can be approximated by a *noniterative* procedure better and better. This is clearly a numerically more expensive solution.

Working in time domain, alternatively, the inverse problem leads to performing a *deconvolution*:

$$f_s = (\Delta\langle\tilde{\Psi}_\Sigma\rangle - h_{\Psi,g} * f_g)^{-1} h_{\Psi,s}. \quad (16)$$

Note that we wrote  $\Delta\langle\tilde{\Psi}_\Sigma\rangle[l]$  in the above which should exactly correspond to the appropriately defined circular convolution in (15) as  $l = 0, \dots, 2(L-1)$ . Clearly, in time domain too  $f_s[l]$ ,  $l = 0, \dots, L-1$ , is obtained iteratively, in three stages similarly as outlined above in frequency domain. One can use Matlab's `deconv` to perform the deconvolution. We find in simple examples studied (results not shown) that without noise the procedure in time domain leads to the very same solution as the procedure in frequency domain. This is not the case with additive noise, which means that the deconvolution/inverse problem is *ill-posed* in this case. However, the weaker the noise, the closer the outcome to the true solution, either in time or frequency domain, as long as the procedure converges. We find that in time domain the procedure always converges to some solution, however, with increasing noise strength this solution features oscillations of increasing amplitudes as time advances. Nevertheless, for a certain noise strength when the frequency domain procedure also converges, we find that the solution in time domain is smoother and so closer to the true solution *earlier* in time. This is also what we find considering the PlaSim data, as shown in Fig. 3. We conclude, therefore, that *it is preferable to work in time domain* using Eq. (16) to produce numerical results.<sup>6</sup> Nevertheless, we will carry out our calculations in frequency domain, using e.g. the forcing signals shown in Fig. 3 (a), in order to make the point that even a rough forcing signal convolved with a rough Green's function produces a not so rough response, as we will see in Sec. 3.1.1.

## 2.4 Forcing scenarios

The form of the forcing signal  $f_g$  due to changes in the  $[\text{CO}_2]$  concentration for which we want to solve the geoengineering inverse problem is a ramp that was used in (Lucarini et al., 2017). This is a standard forcing type, also used for the CMIP6 DECK (Diagnostic, Evaluation and Characterization of Klima) protocols (Good et al., 2016). More precisely, it is not a time-continuous ramp for the reason detailed in Sec. 2.2, but the  $[\text{CO}_2]$ , and so  $f_g$ , is kept constant for one year after each incremental increase. The  $[\text{CO}_2][n+1] - [\text{CO}_2][n]$  increment is a (small) *fraction* of the current value  $[\text{CO}_2][n]$ , and therefore increasing in a superlinear fashion with time  $[n]$ , but, due to the logarithmic dependence of the radiative forcing on the  $[\text{CO}_2]$  concentration (Huang and Bani Shahabadi, 2014), it realises a linear radiative forcing signal<sup>7</sup>  $f_g[n]$ , i.e., a constant-in-time ( $n$ ) radiative forcing increment  $f_g[n+1] - f_g[n]$ . Hence the naming 'ramp'. Such a form of the (radiative) forcing signal is useful in diagnosing or interpreting results. For example, if the response characteristic to solar forcing  $f_s$  is similar to that of  $f_g$ , then the required solar forcing to cancel global change would also be approximately ramp-like.

<sup>6</sup> An anonymous referee has suggested that in time domain a simpler alternative way of obtaining the solution by a time marching procedure should exist (not relying on deconvolution). Indeed, one can break down the convolution sum (12) as  $\langle\hat{\Psi}\rangle^{(1)}[n] = \sum_{k=2}^n h_{\Psi,s}[k]f_s[n-k] + h_{\Psi,s}[1]f_s[n-1]$ , which can be expressed for  $f_s[n-1]$  and consider that  $\langle\hat{\Psi}\rangle^{(1)}[n] = \sum_{k=1}^n h_{\Psi,g}[k]f_g[n-k]$  is given for all  $n$ . Suppose  $f_g[0] = 0$ ; then the procedure for finding  $f_s[n-1 > 0]$  can be initialised by  $f_s[0] = 0$  for  $n = 1$ . We have checked that it gives the same result as our procedure, reproducing the time series pattern due to a particular noise realisation in a simple example system.

<sup>7</sup> This is meant to be in a loose sense, because strictly speaking the realised radiative greenhouse forcing (which we do not even try to define here) must not be considered as an external forcing. The external forcing is the  $[\text{CO}_2]$  concentration indeed. A logarithmic scaling of this signal, however, makes no difference inasmuch as a causal Green's functions exist between this scaled variable and well-behaved observables. The scaling is intuitive and standard practice, and we will allow ourselves to refer to  $\ln([\text{CO}_2]/[\text{CO}_2]_0)$  as the radiative greenhouse forcing.

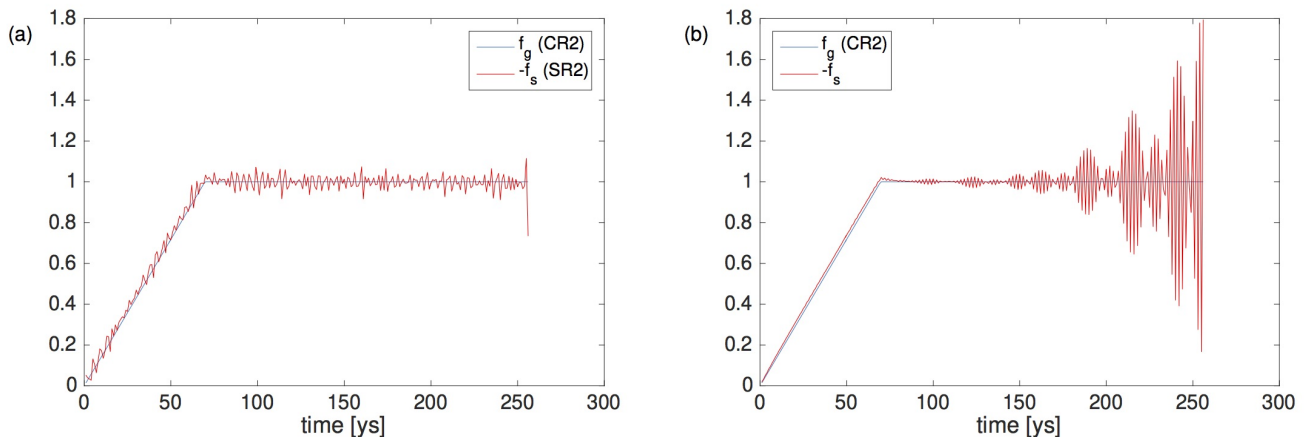

**Figure 3.** Imposed  $[\text{CO}_2]$  or greenhouse forcing and required solar forcing that cancels out global average surface air temperature change. They are *normalised* for the displaying to have a unit plateau level. The required solar forcing is determined in both frequency (a) and time domains (b). We indicate in the legend which data set from Table 1 the forcings belong to. We note that in either case we *neglected the iteration*, skipping stages 1. and 2. and setting  $\Delta\langle\check{\Psi}_{\Sigma}\rangle[l] = \Delta\langle[\check{T}_s]_{\Sigma}\rangle[l] = 0$  for *all*  $l$  straightaway in stage 3., the validity of which is prompted by the very similar Green’s functions  $h_{[T_s],g}$  and  $h_{[T_s],s}$  as indicated by Fig. 2. Correspondingly, the required  $f_s$  is very similar to the given  $f_g$ . A small gap between the red and blue ramps that can be resolved only with a smooth estimate, i.e., in panel (b) but not in (a), which gap develops quickly from the beginning of the ramps, informs us that the system responds slightly faster to the greenhouse forcing, which is already prompted by Fig. 2 (b) and the exact results (not given) of the parameter estimation by fitting. Results presented in Sec. 4 prompt that it is **likely** to do with nonlinearity, which makes the response towards negative and positive anomalies “asymmetric”, **resulting also in different spatial patterns, while the time scales associated with different locales are quite varied (not shown).**

Note, however, that a linearity of the response characteristic to any forcing is checked by a comparison of the linear prediction with the truth in terms of a model simulation subject to the same forcing. Beside the nonlinearity, another factor that gives rise to a discrepancy is a statistical error due to the finite ensemble size. However, the latter has a very distinct feature that can be visually told apart easily from the contribution of nonlinearity. We reiterate that by applying a staircase-like forcing we

5 guarantee that the said discrepancy has no contribution due to performing calculations in discrete-time.

We point out that at asymptotic times there is no discrepancy because of the way we estimate the Green’s function (Sec. 2.2); the discrepancy emerges *transiently* only. The all-time maximum of it is a useful intuitive measure of nonlinearity in the examined regime. However, clearly, the larger the response the larger the nonlinear contribution to it, and so – in the context of system identification – the more inaccurate our estimate of the susceptibilities (Sec. 2.2) become. Therefore, beside

10 our *base scenario* of (overall) doubling  $[\text{CO}_2]$ , we will also check if we can obtain a more accurate (and so useful for the geoengineering problem) estimate of the Green’s function using a *weaker* identification forcing, in particular one that results in *half* of the (overall) radiative forcing change of that by doubling  $[\text{CO}_2]$  (realised by  $[\text{CO}_2]_{\infty}/[\text{CO}_2]_0 = \sqrt{2}$ , according to the

**Table 1.** Sets of simulation data specified by the forcing. Each data set is codenamed by a three character code; the first character coding the quantity in which the forcing is presented (C for  $[\text{CO}_2]$ , S for ‘solar irradiance’); the second character coding the ‘form’ of the forcing signal (S for ‘step’, R for ‘ramp’; Q for ‘slow ramp’); and the third character coding the plateau level of the (corresponding – see main text) greenhouse forcing (2 for  $[\text{CO}_2]_\infty/[\text{CO}_2]_0 = 2$ , and 1 for  $[\text{CO}_2]_\infty/[\text{CO}_2]_0 = \sqrt{2}$ ). The CS2 and CR2 data sets are preexisting to the present study (Lucarini et al., 2017) containing 200 ensemble members. All new data sets listed here contain 20 ensemble members each, except for CQ2 which contains 10.

|                 | Step |            | Ramp |            | Slow ramp | Form    |
|-----------------|------|------------|------|------------|-----------|---------|
| Forcing         | 2    | $\sqrt{2}$ | 2    | $\sqrt{2}$ | 2         | Plateau |
| $[\text{CO}_2]$ | CS2  | CS1        | CR2  | CR1        | CQ2       |         |
| Solar           | SS2  | SS1        | SR2  | SR1        |           |         |
| Combined        |      |            | BR2  | BR1        |           |         |
| Quantity        |      |            |      |            |           |         |

above mentioned logarithmic law (Huang and Bani Shahabadi, 2014)). Note that in the case of this weaker forcing, irrespective of the different plateau level, the increments of the  $[\text{CO}_2]$  changes realise the same 1%/yr relative change.

We refer the reader to Table 1 for an overview of the various identification and test forcing scenarios that we used in the present study. Among them we have CQ2 defined by 0.1%/yr relative changes, which makes it a much slower change than the base scenario. The response to such a slow ramp forcing should be ramp-like as long as the linear term in (2) dominates over the nonlinear ones. This forcing scenario will therefore provide us another reference in interpreting other results with respect to linearity.

In the said table we did not indicate the plateau level of the solar forcing  $f_s$  used in conjunction with  $f_g$ . We chose this level such that the response asymptotically in terms of the global average surface air temperature is the same but of opposite sign as that due to the corresponding  $f_g$ . This level can be easily determined to a good approximation by an iterative procedure. Beside those in Table 1, we will introduce a few more forcing scenarios in Sec. 4 that will aid the interpretation of our results and others that give improved results.

### 3 Results

#### 3.1 Surface air temperature

##### 3.1.1 Global average

This is the variable with respect to which we *prescribe* the cancellation. We do *not* consider any other variable in this role throughout the present study. Having predicted the solar forcings (SR1, SR2) required to produce no total response used in

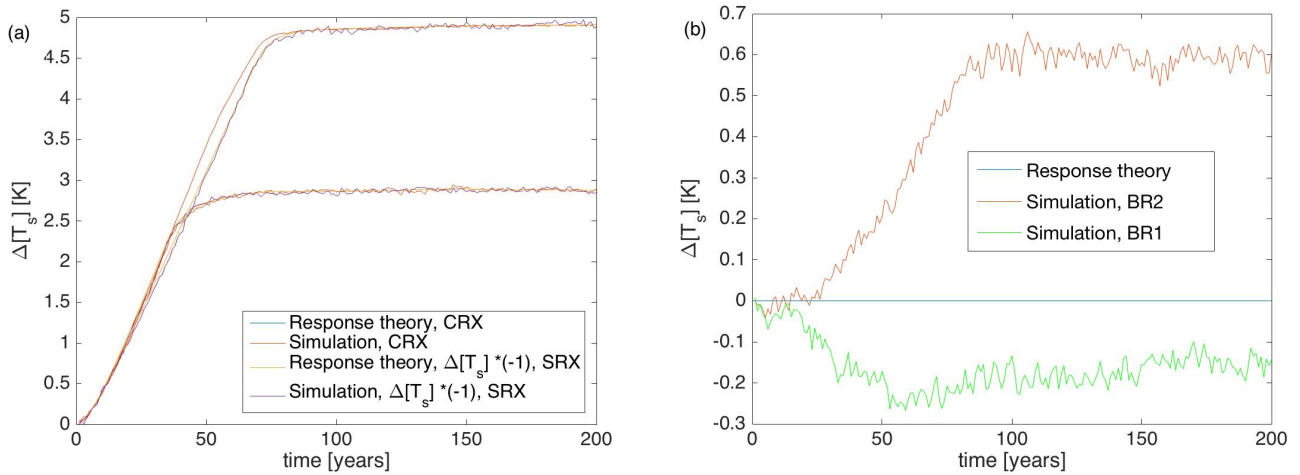

**Figure 4.** Predicted and true surface air temperature responses to ramp-like forcings. Forcing scenarios are: (a) CR1, CR2, SR1, SR2, (b) BR1, BR2. Note that in panel (a) the two yellow curves perfectly cover the corresponding blue ones, because  $f_s$  is calculated to cancel global warming at all times.

combination with prescribed  $[\text{CO}_2]$  forcings (CR1, CR2) adopting the methodology described in Sec. 2.3 (see also the note in the figure caption of Fig. 3), we plot the predicted linear responses in Fig. 4 (a). Clearly, these predictions can be viewed either as components of the *predicted* total response (BR1, BR2), or the predicted response in separate scenarios (CR1, CR2, SR1, SR2). Alongside these predictions we plot the true response in the scenarios when the forcings are applied separately, i.e., the responses evaluated by direct numerical simulations (CR1, CR2, SR1, SR2). Regarding our objective (I), the comparison of prediction and truth reveals that (i) the response to stronger forcing is more nonlinear in the case of greenhouse forcing (CR2) in comparison with solar forcing (SR2); and that (ii) with a weaker identification (CS1, SS1) and test forcing (CR1, SR1) the linear prediction for CR1 is much better than for CR2, while SR1 is seemingly as good as SR2. For the scenarios of combined forcing (BR1, BR2) only the true response is nontrivial if nonlinear, which is displayed in Fig. 4 (b). Indeed, because of the nonlinearity, the total asymptotic response is nonzero. **(Note that the fluctuations at asymptotic time are due to the finite ensemble size.)** It is visibly nonzero even with the weaker forcings. However, it is just about 10% of that with greenhouse forcing solely even in the case of the stronger forcings.

The pronounced nonlinearity (i) shows up also in other experiments. With a very slow forcing CQ2 we registered the response as shown in Fig. 5. Despite that the rate of forcing is unchanged throughout the almost 700 years, the response switches to a slower rate between 400 to 500 years, or, between 3 to 4 [K] changes in the temperature<sup>8</sup>. The placement of this change of the rate, compared to the asymptotic temperature change of almost 3 K upon the weaker CR1 forcing seen in panel (a), is in good agreement with the observation of a much more closely linear response to that weaker forcing as compared to CR2. A

<sup>8</sup>Clearly, a slower rate of change of the response to a slow forcing translates to a smaller static susceptibility (at  $\omega = 0$ ), i.e., sensitivity.



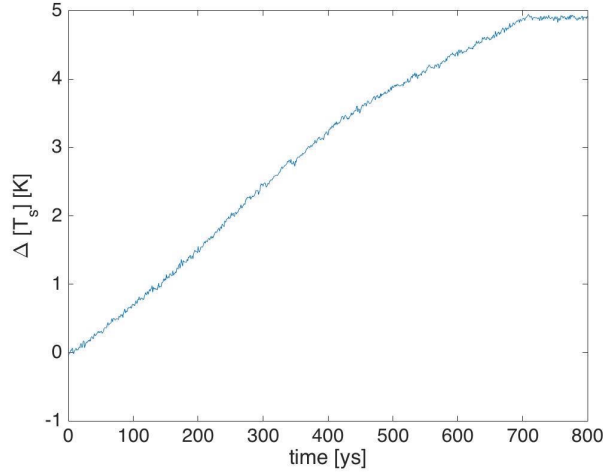

**Figure 5.** True response of the global mean surface temperature under a very slow ramp forcing, CQ2.

crude indicator of non/linearity can be extracted from the CQ2 experiment, but also from comparing the asymptotic/stationary responses (denoted by a subscript  $\infty$ ) in the XX1 and XX2 experiments, as **the following ratio**:

$$\rho = \frac{\frac{\Delta\langle[T_s]_{\infty,2}\rangle}{\Delta\langle[T_s]_{\infty,1}\rangle}}{\frac{f_{\infty,2}}{f_{\infty,1}}} = \frac{\frac{\Delta\langle[T_s]_{\infty,2}\rangle}{f_{\infty,2}}}{\frac{\Delta\langle[T_s]_{\infty,1}\rangle}{f_{\infty,1}}}. \quad (17)$$

(Note that we write an ‘X’ in place of one of the possible characters in the scenario identification code when it does not matter which of the possible characters is written there.) This value is  $\rho = 0.99$  with solar forcing and 0.85 with greenhouse forcing, in agreement with what the comparison of predicted and true responses seen in Fig. 4 (a) allowed us to conclude above.

### 3.1.2 Zonal average

We begin with the zonally-averaged fields of the surface air temperature for our *diagnosis* of any residual total response in terms of other observables than the one for which a desired evolution has been (attempted to be) enforced. First, we show results with the  $\sqrt{2}$ -fold  $[\text{CO}_2]$  increase (CR1, BR1). Treating zonal means, following (Lucarini et al., 2017) (where only the case of  $[\text{CO}_2]$ -doubling was treated), in a similar fashion to global means informs us that the response to either greenhouse or solar forcing is the strongest at high-latitude/polar regions; see Figs. 6 (a) and (c). This is where the response is most nonlinear, as indicated by Figs. 6 (b) and (d), showing the difference between truth and prediction. **This nonlinearity should be due to albedo saturation and/or nonlinear characteristics of radiation physics, as discussed in (Winton, 2013; Good et al., 2015; Lucarini et al., 2017).** In Figs. 6 (b) and (d) we see colors for nonzero values also in the whole stretch of stationary forcing, however, for the different latitudes separately, after a fast approach of the stationary climate, the time-average should be zero by means of the used methodology (except for a small finite data statistical error). As a consequence of the said nonlinearities,

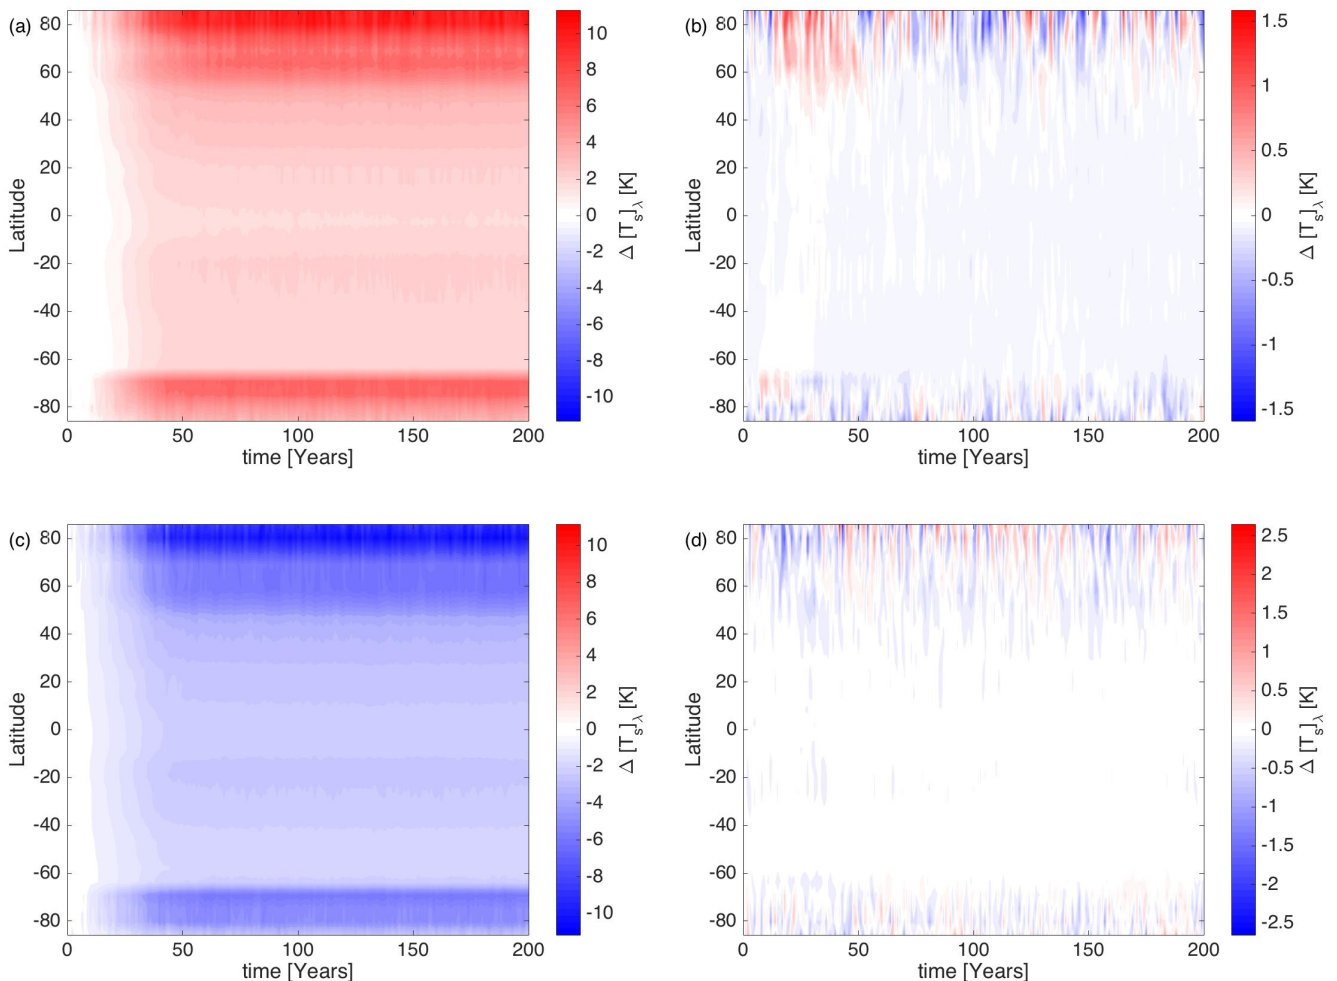

**Figure 6.** Response of the zonally-averaged surface air temperature to ramp forcings. The first column shows the true responses and the second one the errors of the linear predictions. The first and second rows belong to the CR1 and SR1 forcing scenarios, respectively. Similar diagrams as in the first row but for CR2 are shown in Fig. 6 of (Lucarini et al., 2017).

in the high-latitude regions linear response theory ‘badly fails’ to predict the total response to combined forcing, also in the regime of stationary climate; compare Figs. 7 (a) and (b) showing the prediction and truth, respectively.

In addition to such a visual comparison it is customary to quantify the discrepancy by measuring the error of prediction *relative* to the true value. However, the true value can be zero at certain latitudes which makes this naive relative error measure lacking an obvious meaning. In these situations it is customary (Tornqvist et al., 1985) to analyse the following relative error:

$$e_1 = \frac{|\Delta\langle\Psi\rangle_{\text{BRX}} - \langle\Psi\rangle_{\text{BRX}}^{(1)}|}{|\Delta\langle\Psi\rangle_{\text{BRX}}| + |\langle\Psi\rangle_{\text{BRX}}^{(1)}|}. \quad (18)$$

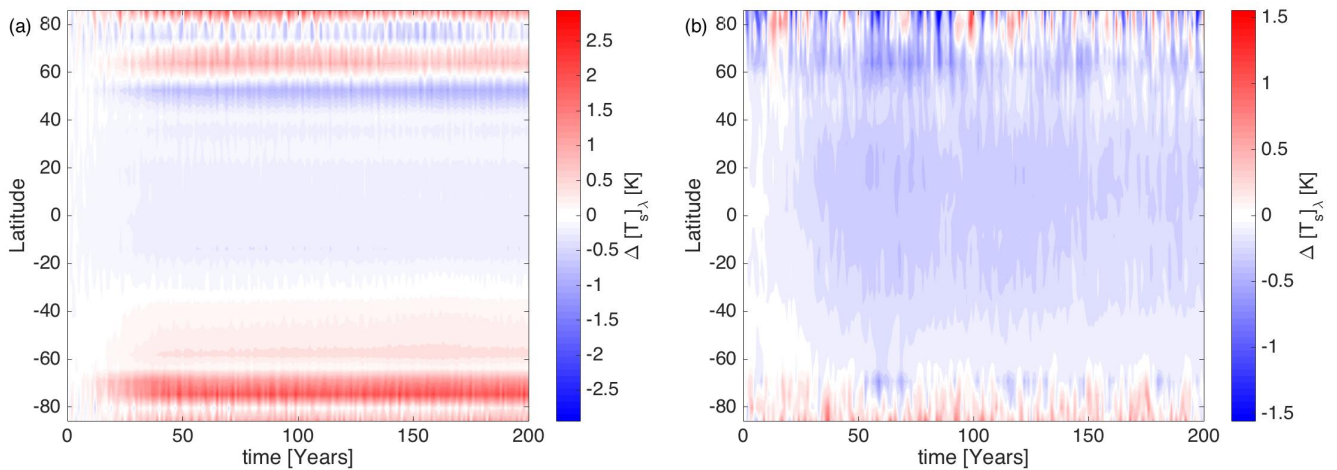

**Figure 7.** Predicted (a) and true (b) total responses of the zonally-averaged surface air temperature to combined ramp forcings (BR1).

It takes on values from  $[0,1]$  for all values of  $\Delta\langle\Psi\rangle_{\text{BRX}}$  and  $\langle\Psi\rangle_{\text{BRX}}^{(1)}$ ; and, clearly, a larger value should be considered worse.

**Clearly,  $e_1(\mu)$  as a function of latitudes would facilitate the comparison of the predictive skill of linear response theory at different latitudes.** We note that in Eq. (18)  $\langle\Psi\rangle_{\text{BRX}}^{(1)}$  is meant to be an estimator of the actual quantity, which estimator is biased, but for keeping it simple, we do not introduce a separate symbol for the estimator. Another possibility in our situation

5 is measuring the error of prediction of the response to combined forcing relative to the response to one of the forcings:

$$e_2 = \frac{|\Delta\langle\Psi\rangle_{\text{BRX}} - \langle\Psi\rangle_{\text{BRX}}^{(1)}|}{\Delta\langle\Psi\rangle_{\text{CRX}}}. \quad (19)$$

We evaluate  $e_1$  and  $e_2$  only with respect to the stationary climate, in which case the estimation is very accurate as we can take an average also with respect to time. Fig. 8 (a) shows the result in the case of the weaker forcing (CR1, BR1). Both  $e_1$  and  $e_2$  indicate **with good agreement** that the prediction is the poorest at some high-latitude regions.

10 With  $[\text{CO}_2]$ -doubling (CR2, BR2), results shown in Fig. 8 (b), the performance has a different characteristic as compared with weak forcing. **Both**  $e_1$  and  $e_2$  are the highest at both equatorial and some high-latitude regions, and somewhat less at polar and some Southern Hemisphere midlatitude regions.

### 3.1.3 Spatial pattern

A more comprehensive view of the spatial variation of the response is given by the distribution over the 2D surface, predicting  
 15 or ‘measuring’ (computing) the response in each gridpoint separately, as done in (Lucarini et al., 2017). Similarly to zonal averages, the response patterns to greenhouse and solar forcings are very similar in the stationary climate regimes; see Fig. 9 (a) and (b) for the strong forcings CR2 and SR2, respectively. **(See (Hansen et al., 2005) for such a comparison in a complex model.) The patterns in Fig. 9 (a) and (b) are misaligned slightly, which results in nonzero predicted total responses**

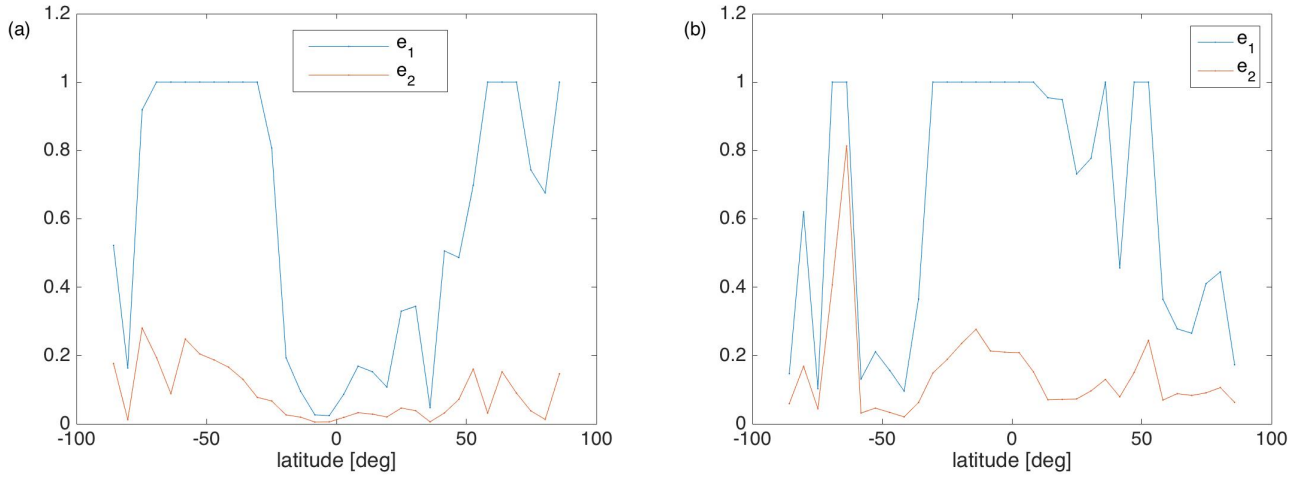

**Figure 8.** Relative errors  $e_1$  and  $e_2$  defined respectively by Eqs. (18) and (19) for the predicted total responses of the zonally-averaged surface air temperature to combined ramp forcings. (a) is a companion diagram to those in Figs. 6 and 7 belonging to the weak forcing scenarios (CR1, BR1), whereas (b) shows the same for the stronger forcing scenarios (CR2, BR2). Discrete data points are connected by lines to aid reading the diagram.

of opposite sign in neighbouring regions, BR2. It is shown in panel (c) of the same Figure. The picture for the weaker forcings, CR1, SR1 (not shown), BR1 (Fig.9 (e)), is similar.

Unsurprisingly, large predicted residual total responses occur where the response is large to either greenhouse or solar forcing alone. However, the predicted total response turns out to be grossly erroneous (II); the truth regarding the surface air temperature, shown in panel (d) for BR2 and (f) for BR1, is much ‘better behaved’ for both forcing strengths: *significant cancellation is achieved even locally*. (We note that the overwhelmingly red (blue) color in panel (d) ((f)) is consistent with the signs of the true residual total global change shown in Fig. 4 (b).) However, looking at the temperatures at the highest model level, nearest the tropopause, the response under combined forcing (BX2) relative to the response under, say, solar forcing alone (SX2) is much larger at the tropopause – evidenced in Fig. 10 (a) and (b) – in comparison with the surface, the latter given by comparison of Fig. 9 (b) and (f).

### 3.2 Annual precipitation

Here we present results for another diagnostic observable the annual precipitation  $P_y$  with a reversed order with respect to the spatial characteristics as compared to Sec 3.1; and we do not distribute the material into subsections. In terms of the spatial patterns of response, very similar conclusions can be drawn for the precipitation as for the surface air temperature, which is supported by the set of diagrams in Fig. 11. **However**, the largest responses are observed at equatorial regions, **and it is not clear what mechanism causes it**. Most importantly: *significant cancellation is actually achieved as opposed to the ‘damning’*

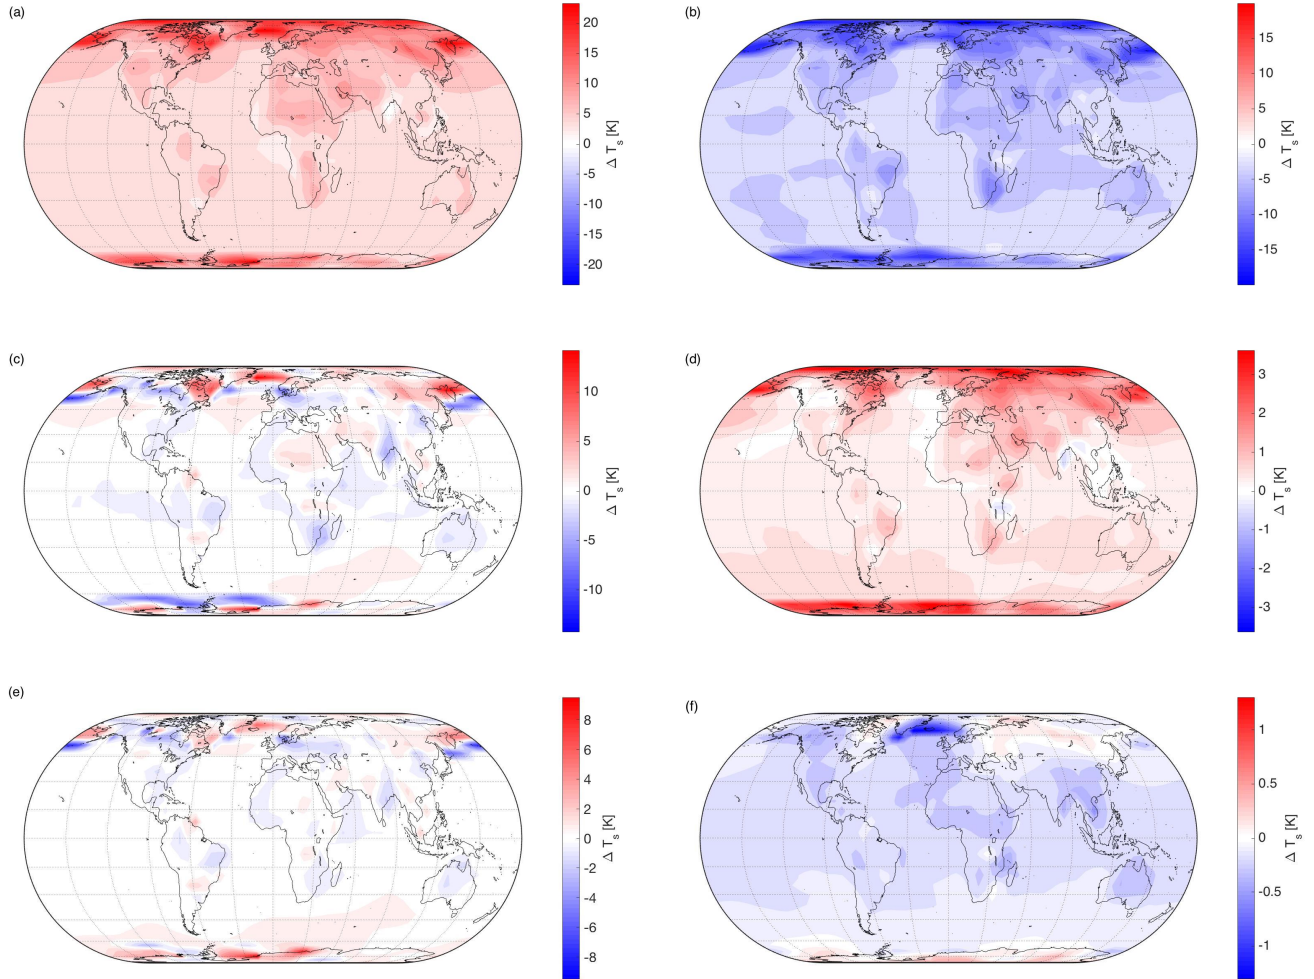

**Figure 9.** Spatial variation of the stationary climate in terms of the surface air temperature belonging to different forcing levels specified by plateaus of forcings collected in Table 1. (a) CX2 (b) SX2 (c) BX2 (d) BX2 (e) BX1 (f) BX1. All diagrams picture the truth, except for (c) and (e) which show the linear predictions. Mind the different ranges of the temperature for the colourbars.



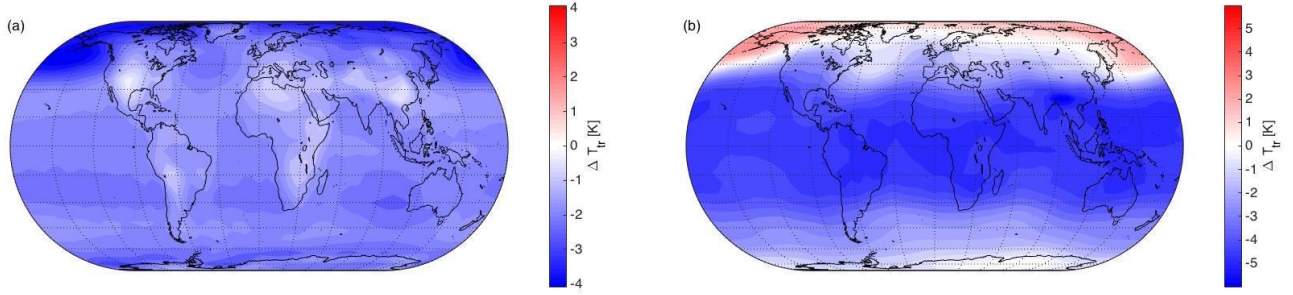

**Figure 10.** True spatial variation of the stationary climate in terms of the air temperature in the topmost model layer, nearest to the tropopause. (a) BX2 (b) SX2.

**Table 2.** Global average stationary climatology of the annual precipitation belonging to different forcing levels.

| Forcing                                 | CX1 | CX2 | SX1 | SX2  |
|-----------------------------------------|-----|-----|-----|------|
| $\Delta\langle[P_y]\rangle_\infty$ [mm] | 74  | 124 | -71 | -121 |

*linear prediction.* This is so even if the solar forcing used is the same as before, i.e., that was determined with the aim to cancel global warming (not wettening; **in the same spirit as Fig. 4 of (MacMartin and Kravitz, 2016)**). This clearly suggests that the response characteristic of  $P_y$  to greenhouse and solar forcing, say in terms of the respective Green’s functions, are very similar, similarly to the corresponding Green’s functions of  $T_s$ . Nevertheless, a difference of the response characteristics of  $[P_y]$  and  $[T_s]$  is manifested in the nonzero linear prediction for the total response in the stationary climate seen in Fig. 12. In comparison with the true total responses plotted in the same diagram, the linear prediction is quite ‘unreliable’, as can be expected from **the mismatch of the true and predicted** spatial patterns. Otherwise, both the predicted and the true total **global mean** responses to combined forcing look rather negligible to the responses to the greenhouse or solar forcings acting separately, listed in Table 2. Interestingly, the transient responses (not shown) have similar qualities to those of the temperature: nonlinearity is most obvious for CR2 as opposed to CR1, SR1, SR2.

We note that Equatorial drying under a similar geoengineering scenario has also been reported in (Ferraro et al., 2014; MacMartin and Kravitz, 2016). However, in **these studies** a quadrupling of  $[\text{CO}_2]$  was considered. We point out that it does seem to matter what levels of change we consider: under  $[\text{CO}_2]$ -doubling we find **actually less drying** than in the case of the  $\sqrt{2}$ -fold  $[\text{CO}_2]$  increase. This finding can, however, have different reasons. One candidate is that the response under combined forcing is nonlinear; and the other one is that (assuming that the response under combined forcing is approximately linear) the required solar forcing was determined inaccurately (which resulted already in a residual response as seen in Fig. 4 (b)). **Note that in (Ferraro et al., 2014; MacMartin and Kravitz, 2016) an exact cancellation of global mean surface temperature was achieved in the stationary climate, like e.g. in the G1 GeoMIP experiment. Given this, Fig. 4 of (MacMartin and**

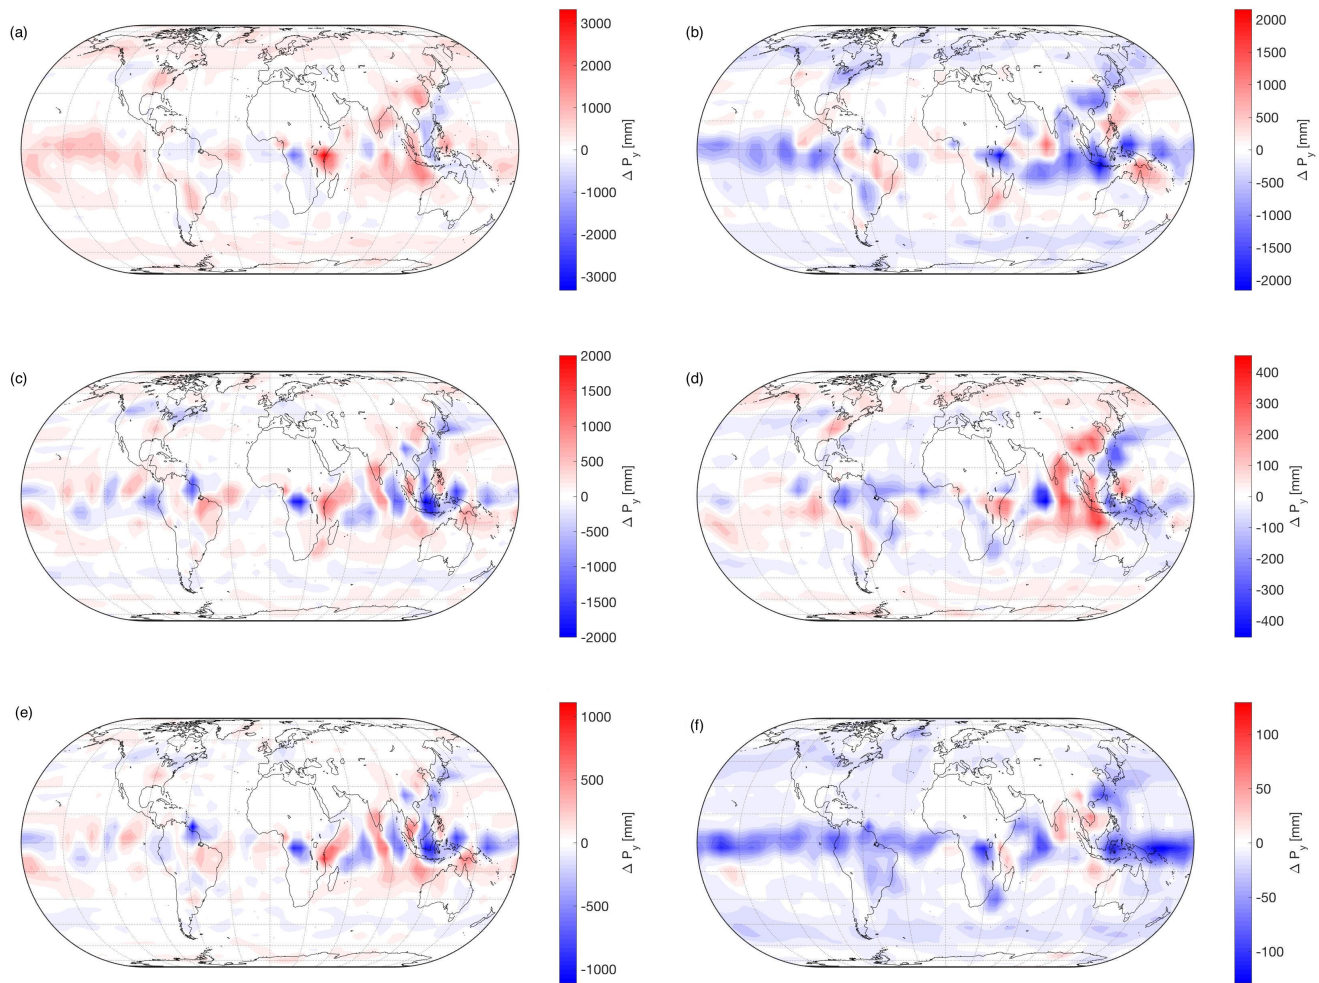

**Figure 11.** Same as Fig. 9 but for the annual precipitation.

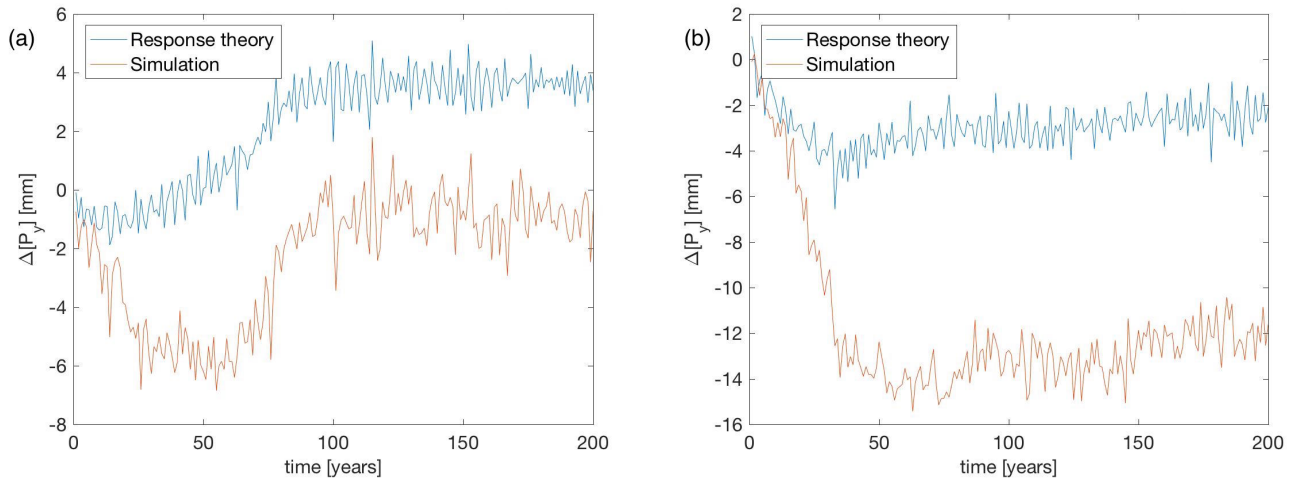

**Figure 12.** Same as Fig. 4 (b) but for the annual precipitation, and showing separately the cases of (a) BR2 and (b) BR1..

Kravitz, 2016) indicates that the response of the global mean is approximately linear in most CMIP5 models considered, at least up to a certain forcing level that was actually lower than  $[\text{CO}_2]$ -doubling. In the following we show that both of these effects play a role, i.e., nonlinearity is also present in our case, however, it should not be the dominant component.

Drying while global average surface temperature would be maintained in a model was reported also in (Ricke et al., 2010, 2012).

## 4 Improved methodology and results

### 4.1 Achieving cancellation (I)

The very close resemblance of the patterns seen in Fig. 9 (a) and (b) hints that the effect of a changing  $[\text{CO}_2]$  on the radiative forcing shaping the surface air temperature is very similar to that by a changing solar strength. However, by this data we are not properly informed about just how similar, because e.g. the CR2 and SR2 forcings act in *opposite* directions, and because of nonlinearities they do not have to have the same effect even if the effect due to forcings acting in the same direction were indistinguishable. Therefore, we produced just that missing simulation: complimenting SS2, for which the applied solar forcing is a step of equal magnitude but opposite sign. For this forcing the stationary climate is shown in Fig. 15 (a), to be referred to as SS2I. It is virtually indistinguishable from the pattern resulting for CS2, seen in Fig. 9 (a), including a lack of such misalignment like the comparison of panels (a) and (b) of Fig. 9 revealed. This goes beyond the report on the (approximate) “equivalence” of greenhouse and solar forcings with respect to (asymptotic in time) *global average* surface temperature (Boschi et al., 2013); this is extended now to *regional averages*, i.e., spatial patterns, of that variable with a remarkable degree of approximation. (Just how close this equivalence is is to be indicated by Fig. 14 (a).)



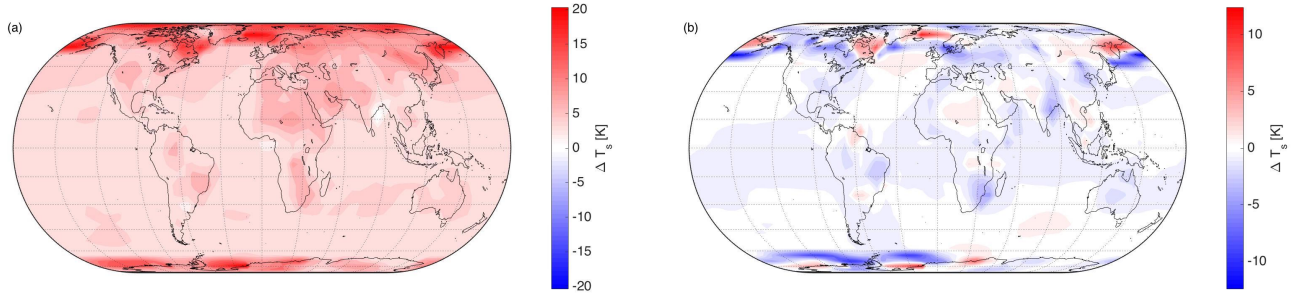

**Figure 13.** Spatial variation of the stationary climate in terms of the air temperature. (a) True response under SS2I, (b) predicted response under combined forcings used for SS2 and SS2I amounting to no forcing.

The superposition of the stationary climates for SS2 and SS2I, displayed in Fig. 15 (b), is in turn almost indistinguishable from the asymptotic total response to combined BR2 forcing, seen in Fig. 9 (c). By inspection of Eq. (2), this pattern turns out to be created by even-order nonlinear perturbative terms of the response. The selection of the even order terms takes exactly the superposition of the responses from two experiments where the forcing is equal and has opposite sign:  $\varepsilon_1 = -\varepsilon_2$ .

5 Instead of eliminating the even-order terms by superposition, of course we can retain only the odd-order terms by subtraction. We proceed in this direction assuming that the third and higher-odd-order terms have a negligible contribution. This way we attempt to improve on the results for the linear susceptibility – and so ultimately on our prediction of the required solar forcing needed for canceling global warming. This is done clearly to the end of making an advance regarding our objective (I). We can then apply this forcing in a new experiment coded as BR2C (‘C’ for ‘cancel’). For this experiment we can utilise (although  
10 we will not examine the transient<sup>9</sup>) our finding that the response characteristics to greenhouse and solar, i.e., short-wave and long-wave radiative, forcings are very similar, which would allow for applying a solar forcing that is a simple straight ramp, just like  $\log([\text{CO}_2]/[\text{CO}_2]_0)(t)$ , having the same length before the plateau. **(This should be the rationale behind the G2 experiments of GeoMIP.)** That is, what we improve on here is only the *level* of the plateau. It is rather straightforward to obtain the following equations for this level  $f_{\infty, BR2C, s}$ :

$$15 \quad \chi_{[T_s], \infty, s} = \frac{|\Delta \langle [T_s] \rangle_{\infty, SS2}| + |\Delta \langle [T_s] \rangle_{\infty, SS2I}|}{2|f_{\infty, SS2}|}, \quad (20)$$

$$\chi_{[T_s], \infty, g} = \frac{|\Delta \langle [T_s] \rangle_{\infty, CS2}| + |\Delta \langle [T_s] \rangle_{\infty, CS2I}|}{2|f_{\infty, CS2}|}, \quad (21)$$

$$|\Delta \langle [T_s] \rangle_{\infty, BR2C}| = \chi_{[T_s], \infty, s} |f_{\infty, BR2C, s}| - \chi_{[T_s], \infty, g} |f_{\infty, BR2C, g}|, \quad (22)$$

$$|\Delta \langle [T_s] \rangle_{\infty, BR2C}| = 0. \quad (23)$$

<sup>9</sup>The precise treatment of the transient proceeds by solving the same inverse problem as outlined in Sec. 2.3, centred around eq. (15), only that the impulse responses in that equation, e.g.  $\tilde{h}_{\Psi, g}$ , need to be produced as an average from two simulations each, as also done in (Gritsun and Lucarini, 2017).

The subscripts of  $\infty$  refer to the asymptotic/stationary climate regime, other subscripts refer to the experiment/forcing scenario. Observe that data from a new experiment is needed, CS2I, where the ‘I’ indicates an experiment related with CS2 analogously to the relation of SS2I with SS2. Since we are interested in the stationary climate regime only, due to ergodicity we can produce just a single long trajectory instead of an ensemble. The result of this is  $\Delta\langle[T_s]\rangle_{\infty,CS2I} = -5.11$  [K] (while we already have  $\Delta\langle[T_s]\rangle_{\infty,SS2I} = 4.36$  [K], and from Fig. 2 that  $\Delta\langle[T_s]\rangle_{\infty,SS2} = -\Delta\langle[T_s]\rangle_{\infty,CS2} = -4.90$  [K]). Having that

$$\frac{|f_{\infty,BR2C,s}|}{|f_{\infty,SS2}|} = \frac{|\Delta\langle[T_s]\rangle_{\infty,CS2}| + |\Delta\langle[T_s]\rangle_{\infty,CS2I}|}{|\Delta\langle[T_s]\rangle_{\infty,SS2}| + |\Delta\langle[T_s]\rangle_{\infty,SS2I}|} = 1.08. \quad (24)$$

In fact, we carried out the BR2C experiment independently: *iteratively* determining a solar forcing that cancels to a very good approximation the total response (similarly how the level for e.g. SS2 was determined observing the result of CS2). This forcing in the above relative terms was found to be 1.11, agreeing well with our prediction of 1.08.

Given that our prediction is smaller than the actually needed forcing for cancellation, we can predict an *upper bound* on the actual total response to our predicted forcing by substituting into Eq. (22) the actually needed value  $|f_{\infty,BR2C,s}|/|f_{\infty,SS2}| = 1.11$  (**assuming that the response under combined forcing is linear**). This gives  $\Delta\langle[T_s]\rangle_{\infty,BR2C} < 0.134$  [K]. Considering that the total residual response with the original methodology (Sec. 2) was 0.6 [K], this means that with the improved methodology we managed to reduce the total response almost to the *one fifth* or even less of the said first result. (Of course, the exact reduction can be easily obtained by an extra simulation, which we have not run.) In fact, some residual total response even with the improved method could be expected, as the simple measure of nonlinearity (17) indicated that linearity is much more ‘violated’ by increasing radiative forcing as opposed to a reducing one. This prompts that the third-order *odd* perturbative term is not ‘minuscule’ relative to the second order one – contrary to the assumption of our improved methodology. **Another source of error could be a nonlinear component of the response under combined forcing.**

## 4.2 Uncontrolled response and its (non)linearity (II)

Even if we managed to achieve a perfect cancellation in terms of the global averages, amounting to a success in terms of our objective (I), it is still important to examine the total response in terms of any other observables regarding which the cancellation is not enforced, whether there is any unwanted residual. To this end we look at the BR2C data. In particular, in Fig. 14 we show the spatial variations of the stationary climate in terms of (a) the surface air temperature and (b) annual precipitation. The former one looks like a ‘crossover’ of Fig. 9 (d) and (f), and the latter like that of Fig. 11 (d) and (f). More precisely, the new diagrams look to lie in between the respective said old diagrams in the sense of an interpolation. This implies that the (true/simulated) variances with respect to space for BR2C (‘perfect job’), both for temperature and precipitation, are about the same as those for BR2 (‘less than perfect job’), and are much larger than the residual total responses in terms of the respective global averages for BR2. The reason for this is clearly that the response characteristics<sup>10</sup> to greenhouse and solar forcing coinciding with respect to the individual spatial locales are somewhat different. However, it is not really the constancy

<sup>10</sup>This characteristics is certainly meant to be within the regimes of the actually realised total response. As this regime is finite, possibly significant nonlinear elements of the characteristics are included in our meaning. This is why we did not write at this point ‘sensitivity’ in place of ‘characteristics’.

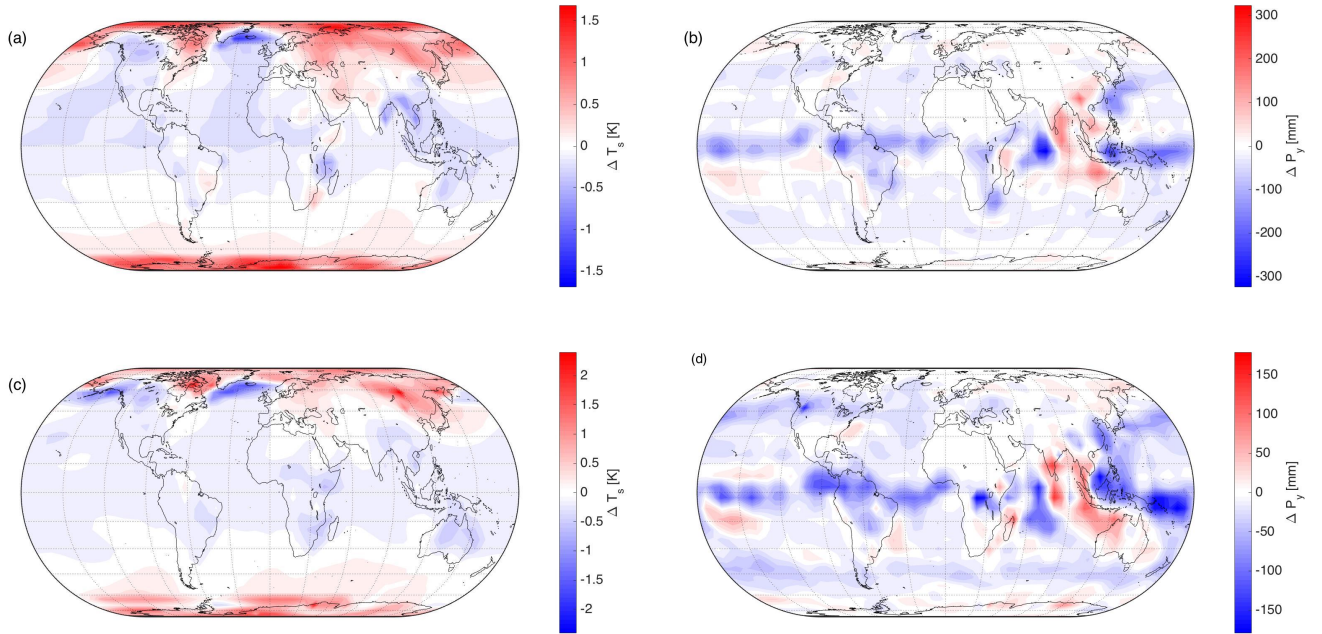

**Figure 14.** Spatial variation of the stationary climate in terms of (a) the surface air temperature and (b) annual precipitation in the BR2C experiment, when a change in the global average surface air temperature is canceled. (c)/(d) The improved linear prediction corresponding to (a)/(b).

of the spatial variance with (slightly) varying levels of the applied solar forcing that is important from a practical point of view, but rather the sensitivity of the response in any locale. Comparing the BR2 and BR2C scenarios, we see that the difference in terms of the climatic surface air temperature could be as much as 2 [K], which is about 10% of the maximal response under the corresponding greenhouse forcing alone.

- 5     **The improved methodology to estimate susceptibilities applies of course to regional averages too. What remains to be seen now is if linear response theory can predict the residual total responses seen in Fig. 14 (a) and (b) (II). The corresponding linear predictions are shown in panels (c) and (d), respectively. These predictions show a dramatic improvement on the first results shown in Fig. 9 (d) and Fig. 11 (d), respectively. Quantitatively, however, the prediction is not perfect. We can quantify this by e.g. the Pearson correlation coefficient  $C$  between the truth  $\Delta\langle\Psi\rangle$  and the**
- 10   **linear prediction  $\langle\Psi\rangle^{(1)}$ , the results of which is shown in Table 3. (Note that no weighting of the data points with the area represented by grid points is done.) This shows that the prediction skill is better for the temperature than the precipitation.**

Whether the imperfection of the linear prediction is due to nonlinearity – as a small error  $E = \Delta\langle\Psi\rangle - \langle\Psi\rangle^{(1)}$  should normally suggest – is not clear, because it is possible that the response  $\Delta\langle\Psi\rangle$  is linear but errors in the susceptibility

Table 3. Measures of overall nonlinearity of the response in terms of the local temperature and precipitation.  $C$  is the Pearson correlation coefficient between the truth  $\Delta\langle\Psi\rangle$  and the linear prediction  $\langle\Psi\rangle^{(1)}$ , and  $\rho$  is defined by Eq. (26). Note that to calculate  $\text{std}(\rho)$ , values of  $\rho$  larger in modulus than 5 are discarded. The last column is devoted to the global averages.

|       | Pearson corr. coeff. | $\text{std}(\rho)$ | $\rho$ |
|-------|----------------------|--------------------|--------|
| $T_s$ | 0.78                 | 0.26               | 0.73   |
| $P_y$ | 0.53                 | 1.01               | 0.70   |

estimates determining  $\langle\Psi\rangle^{(1)}$  (or rather its estimator) remain. We should thus find a way to check linearity without relying on the linear prediction. This can be done in a naive way similarly to (17). However, this time we do not have a single forcing present but two. Because of this, it turns out that a check of linearity requires not two but three data points at least. In fact we are readily endowed by three data set candidates resulting from the BR1, BR2 and BR2C experiments. In each scenario, if the response is linear the asymptotic climate would be given by an equation like

$$\Delta\langle\Psi_i\rangle = \chi_{\Psi,g}f_{i,g} + \chi_{\Psi,s}f_{i,s}, \quad i = 1, 2, 3, \quad (25)$$

where  $i = 1, 2, 3$  stand for, say, BR1, BR2, BR2C, in that order. One can express  $\chi_{\Psi,s}$  from the eq. of  $i = 3$ , substitute into the eqs. of  $i = 1, 2$ , and from these latter express  $\chi_{\Psi,g}$ . Under linearity the ratio of these expressions,

$$\rho = \frac{\frac{\Delta\langle\Psi_2\rangle - \Delta\langle\Psi_3\rangle \frac{f_{2,s}}{f_{3,s}}}{f_{2,g} - f_{3,g} \frac{f_{2,s}}{f_{3,s}}}}{\frac{\Delta\langle\Psi_1\rangle - \Delta\langle\Psi_3\rangle \frac{f_{1,s}}{f_{3,s}}}{f_{1,g} - f_{3,g} \frac{f_{1,s}}{f_{3,s}}}}, \quad (26)$$

would be of course unity, meaning that Eqs. (25) are in fact satisfied. We have evaluated  $\rho$  for all grid points and display the results in Fig. 15. This suggests that we do have nonlinearity both for the temperature and precipitation. However, this conclusion can be called into question by noticing that the three data points could be too close to one another so that the ratio is not estimated accurately, prompting nonlinearity falsely. One idea to indicate that deviation from unity of both the correlation coefficient  $C$  and  $\rho$  are due to nonlinearity would be to demonstrate a correlation between the error  $E$  of the linear prediction and  $\rho$ . We have checked the scatter plots of these quantities for both the temperature and precipitation and found no sign of correlations. This, however, does not mean that the response is linear; some unidentified effect can destroy the correlation. Our final idea is that if two situations feature different levels of nonlinearity, even if the two grid-point-wise quantifiers of nonlinearity,  $E$  and  $\rho$ , have random errors, “on average” they should indicate in a coordinated way a stronger deviation from linearity in the case when nonlinearity is actually stronger. We propose to capture this “average” or statistical indicator by the correlation coefficient  $C$ , on the one hand, and the standard deviation  $\text{std}(\rho)$  over the grid points, on the other hand. Clearly, even if linearity is typical, a smaller  $\text{std}(\rho)$  would indicate that it is more typical. We have already given the correlation coefficient in Table 3, where we also display  $\text{std}(\rho)$ . We do indeed see that by both quantities the response of precipitation is prompted to be more nonlinear.

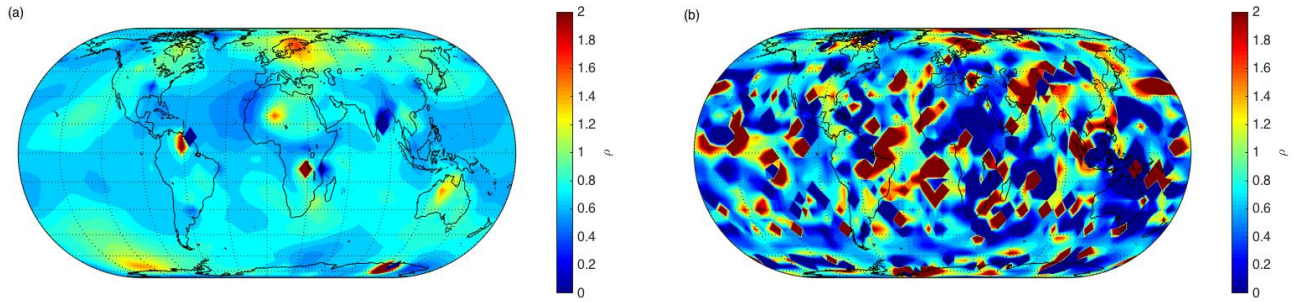

Figure 15. Non/nonlinearity of the response in terms of (a) temperature and (b) precipitation, measured by  $\rho$  given by the expression (26). Any values of  $\rho$  lying outside of the range of the colourbar are represented by the limiting red and blue colours.

In the last column of Table 3 we show  $\rho$  for the global averages  $[T_s]$ ,  $[P_y]$  (not the average of the grid-point-wise  $\rho$ 's, but having e.g.  $\Psi = [T_s]$  in Eq. (26)). The steady state values are estimated by taking the temporal mean of the ensemble means in the last 80 years. These values could be somewhat inaccurate because of the drift seen in Figs. 4 (b) and 12 (b) for the BR1 simulation. But considering the possible maximum values of  $\rho$  for both  $\Psi = [T_s]$  and  $[P_y]$ , a degree of nonlinearity still seems very likely. The figures indicate that the response of the global average precipitation, unlike the local values/regional averages, is not significantly more nonlinear than the response of temperature under geoengineering. These results caution us about the reliability of linear predictions of side effects as part of an assessment exercise;

- predictions of regional responses are less reliable than the global response, and

- some quantities can respond more nonlinearly than others.

## 5 Summary and Outlook

We defined and solved an inverse problem to find a solar forcing that can cancel global warming that would otherwise result from a change in the greenhouse forcing. In fact, we can allow for other choices of the scalar observable **to keep under control**, either with respect to the physical quantity, or considering e.g. local variables. **One can also prescribe an arbitrary time evolution of the chosen observable. The inverse problem constitutes thereby a generic framework for analysing/assessing geoengineering scenarios.** The inverse problem itself was derived in the framework of linear response theory. Because of the true nonlinear characteristics of the response the degree of approximation of the solution specifically for the cancellation of global average surface air temperature depended on the method and its success of determining the linear susceptibilities or Green's functions belonging to the different forcings (I). The issue stems from the fact that for the estimation of the Green's functions we used *finite* magnitude external system identification forcings, in which case the nonlinearity of the response is already felt, while for the cancellation, i.e., *zero* total response, we would need the linear susceptibilities *exactly* – **assuming**

**the response is linear under combined forcing.** An inaccurately predicted required solar forcing leads to a nonzero residual true total response.

By a simple method, also used in (Gritsun and Lucarini, 2017), here, for determining the susceptibilities, we eliminate even-order nonlinearities from the response in the system identification experiments. The price of this is having to run double as many simulations for system identification. In the scenario of doubling CO<sub>2</sub> concentration, by this method we could cut five-fold the unwanted actual total response arising instead of cancellation. Furthermore, the linear prediction of spatial patterns using the improved *local* susceptibilities improved dramatically. **Nevertheless, the prediction is not perfect, and we indicated that the response under combined forcing should be somewhat nonlinear, and the degree of nonlinearity could be typically stronger for some quantities. In particular, we found that in PlaSim the response of precipitation is more nonlinear than that of the surface temperature. This casts a shadow over the use of response theory for an efficient assessment. Perhaps there would be still value in this method as larger scale quantities are expected to be better predictable. It may also be that the nonlinearity is more modest in complex models. Otherwise it would be desirable in the future to work out a method of predicting the nonlinear response in geoengineering scenarios.**

**Ours is the first such analysis of the linearity of regional response under geoengineering. It is a question whether our findings in PlaSim carry over to state-of-the-art Earth System Models because they do respond more weakly in the presence of the seasonal cycle. The question certainly seems valid, however, as also CMIP5 models do feature nonlinear regional response under [CO<sub>2</sub>] forcing only (Good et al., 2015; Winton, 2013). The response of global average surface air temperature and precipitation has been found by MacMartin and Kravitz (2016) approximately linear in some CIMP5 models, seemingly more so than in PlaSim, but weaker forcing than [CO<sub>2</sub>]-doubling was considered, and the linearity of regional responses were not analysed in detail.**

We pointed out also that instead of step-wise system identification forcing, it is better to use a Kronecker delta forcing in order to achieve a better signal-to-noise ratio. As another gain from using a Kronecker delta forcing, the response would be much more modest in magnitude, and hence it would stay further off regimes with more significant contributions of nonlinear terms, and so the linear susceptibilities could be estimated more accurately even by the naive method.

We note that the presented method of predicting a required solar forcing is based on Green's functions that are determined by externally forcing the system of interest. This is clearly not a method that could be put in practice in the case of the Earth system. Therefore, this is another reason, beside the unpredictability of the 21st century greenhouse forcing, why the method is suitable only for scenario analyses. However, the Green's functions might be possible to estimate without externally forcing the system, just from an observation of unforced fluctuations. The crucial question in this regard is whether the fluctuation-dissipation theorem (Kubo, 1966; Leith, 1975) is applicable.

## Appendix: The circular convolution theorem and its application

Taking the discrete-time Fourier transform (DTFT) of Eq. (12) we have, via the convolution theorem for discrete sequences (Katznelson, 1976), a formally analogous version of Eq. (6) with the individual Fourier transforms approximated by Fourier series:

$$\langle \hat{\Psi} \rangle_{2\pi}^{(1)}(\omega) = \hat{\chi}_{\Psi, 2\pi}(\omega) f_{2\pi}(\omega), \quad (1)$$

- 5 where e.g.  $f_{2\pi}(\omega) = \text{DTFT}\{Tf[n]\} = \sum_{n=-\infty}^{\infty} Tf[n]e^{-i\omega n}$  and  $f[n] = \text{DTFT}^{-1}\{T^{-1}f_{2\pi}(\omega)\} = \frac{1}{2\pi T} \int_{-\pi}^{\pi} d\omega f_{2\pi}(\omega)e^{i\omega n}$  with a normalised nondimensional angular frequency  $\omega$ . Featuring instead the dimensional frequency  $f$  measured in Hertz  $= [\text{sec}^{-1}]$ , the forward and inverse transformation pairs are symmetrical:  $f_{1/T}(f) = f_{2\pi}(2\pi fT) = \sum_{n=-\infty}^{\infty} Tf[n]e^{-i2\pi fTn}$  and  $f[n] = T \int_{1/T} df f_{1/T}(f)e^{i2\pi fTn}$ . The DTFT, a continuous function of the frequency  $f$ , is often sampled at  $f = k/(NT)$ ,  $k = 0, \dots, N-1$ :

$$10 \quad f_{1/T}(k/(NT)) = T \sum_{n=-\infty}^{\infty} f[n]e^{-i2\pi kn/N} = T \sum_{n=n_0}^{n_0+N} f_N[n]e^{-i2\pi kn/N} = T \times \text{DFT}\{f_N[n = n_0, \dots, n_0 + N]\}, \quad (2)$$

with any  $n_0$ , which yields the discrete Fourier transform (DFT) of the *finite* sequence  $f_N[n]$ ,  $n = n_0, \dots, n_0 + N$ , where the full infinite sequence  $f_N[n]$ ,  $n \in \mathbb{R}$ , turns out to be  $N$ -periodic, since for the equivalence of the two sums under (2) it has to be in the so-called periodic summation form:

$$f_N[n] = \sum_{m=-\infty}^{\infty} f[n - mN]. \quad (3)$$

- 15 Therefore, when  $f[n]$  is actually  $N$ -periodic, its DTFT is nonzero only at  $f = k/(NT)$ ,  $k \in \mathbb{R}$ , and also periodic, such that the DFT of a single cycle of  $f[n]$  is able to represent its DTFT. For such periodic sequences, to be denoted distinctively using a subscript as  $f_N[n]$ , it can be proven (Katznelson, 1976) that:

$$y * f_N = \text{DTFT}^{-1}\{\text{DTFT}\{y\}\text{DTFT}\{f_N\}\} = \text{DFT}^{-1}\{\text{DFT}\{y_N\}\text{DFT}\{f_N\}\}, \quad (4)$$

- with any nonperiodic sequence  $y[n]$ . Note that  $y * f_N$  is referred to as the *circular convolution* of sequences  $y[n]$  and  $f[n]$ . When  
20 the  $y[n]$  and  $f[n]$  sequences have a finite length,  $n = 0, \dots, N-1$  with any  $N \geq 1$ , so that e.g.  $f_N[n] = f[\text{mod}(n, N)]$ , their circular convolution can be shown (Katznelson, 1976) (<https://uk.mathworks.com/help/signal/ug/linear-and-circular-convolution.html>) to be:

$$(y * f_N)[n = 0, \dots, N-1] = \sum_{k=0}^{N-1} y[k]f_N[n-k] = \text{DFT}^{-1}\{\text{DFT}\{y\}\text{DFT}\{f\}\}, \quad (5)$$

- which equality is called the *circular convolution theorem*. It follows that when  $y[n] = 0$  and  $f[n] = 0$  for  $n = 0, \dots, N_f - 1$   
25 and  $N_y - 1$ , respectively, then  $(y * f_N)[\text{mod}(n-1, N)] = (y * f)[n]$  for  $n = N, \dots, N + \min(N_f + N_y, N-1)$ . Furthermore,  $(y * f)[n]$ ,  $n = 1 + N_f + N_y, \dots, N + 1 + N_y$  is the segment that represents the part of the linear convolution that can be considered useful in the sense that it coincides with the occurrence of the finite values of  $f$  in a finite time interval of length

$N - N_f$ . Therefore, the circular convolution  $(y * f_N)[n]$  captures the useful part of the linear convolution over  $n = \max(1 + N_f + N_y, N), \dots, N + \min(1 + N_y, N_f + N_y, N - 1)$ .

Therefore, when facing the practical situation of having *finite* time series,  $f[l]$  and  $h_\Psi[l]$ ,  $l = 0, \dots, L - 1$ , Eq. (5) can be used to determine the response  $h_\Psi * f[l]$ ,  $l = 0, \dots, L - 1$  (whose usefulness is coming from efficient algorithms for evaluating the DFT, called fast Fourier transform algorithm, FFT). In particular, if the two sequences are to be *padded* in front by a number  $N_f = N_h = N_0$  of zeros equally (so that the circular convolution (5) be well-defined), then the reconstructed length of the linear convolution  $h_\Psi * f$  (the response of a causal system coinciding with the forcing) is  $1 + N_0 - \max(N_0 - L + 1, 0)$ . This is a linear function of  $N_0$  saturating at  $N_0 = L - 1$  reaching the full length  $L$ . Therefore, for simplicity one can pad by  $N_0 = L - 1$  zeros<sup>11</sup>, and we will *denote these padded sequences* by e.g.  $\tilde{f}[l]$ ,  $l = 0, \dots, 2(L - 1)$ . Note that padding with fewer or no zeros results in a circular convolution that better approximates either the useful or the not useful part of the linear convolution, which approximation is the better the more zeros are used. In the extreme case of no padding, very little of the useful part could be well-approximated. The key to the applicability of Eq. (4) is that it does not matter how the forcing  $f[n]$  – and with it the response  $\langle \hat{\Psi} \rangle[n]$  – continue after our experiment, and so they can be thought of as periodic.

*Competing interests.* The authors declare to have no competing interests.

*Acknowledgements.* The authors would like to express their gratitude to an anonymous referee for their very thorough feedback and many suggestions to improve the quality, and also for providing us references of the relevant literature. This work is part of the EU Horizon 2020 project CRESCENDO (under grant No. 641816); the financial support is gratefully acknowledged. It also received support from the EU Blue Action project (under grant No. 727852); and VL acknowledges support from the DFG Sfb/Transregio TRR181 project.

---

<sup>11</sup> This results in an odd sequence length, which has an adverse effect on the common fft algorithm performance. Therefore, in actual practice one can produce time series data of length  $L$  being some power of 2, and pad by an equal number of zeros.



## References

- Abramov, R. V. and Majda, A. J.: New Approximations and Tests of Linear Fluctuation-Response for Chaotic Nonlinear Forced-Dissipative Dynamical Systems, *Journal of Nonlinear Science*, 18, 303–341, <https://doi.org/10.1007/s00332-007-9011-9>, 2008.
- Allen, M. R., Barros, V. R., Broome, J., Cramer, W., Christ, R., Church, J. A., Clarke, L., Dahe, Q., Dasgupta, P., Dubash, N. K., Edenhofer, O., Elgizouli, I., Field, C. B., Forster, P., Friedlingstein, P., Fuglestvedt, J., Gomez-Echeverri, L., Hallegatte, S., Hegerl, G., Howden, M., Jiang, K., Jimenez Cisneros, B., Kattsov, V., Lee, H., Mach, K. J., Marotzke, J., Mastrandrea, M. D., Meyer, L., Minx, J., Mulugetta, Y., O'Brien, K., Oppenheimer, M., Pachauri, R. K., Pereira, J. J., Pichs-Madruga, R., Plattner, G.-K., Pörtner, H.-O., Power, S. B., Preston, B., Ravindranath, N. H., Reisinger, A., Riahi, K., Rusticucci, M., Scholes, R., Seyboth, K., Sokona, Y., Stavins, R., Stocker, T. F., Tschakert, P., van Vuuren, D., van Ypersele, J.-P., Blanco, G., Eby, M., Edmonds, J., Fleurbaey, M., Gerlagh, R., Kartha, S., Kunreuther, H., Rogelj, J., Schaeffer, M., Sedláček, J., Sims, R., Ürges Vorsatz, D., Victor, D., and Yohe, G.: IPCC Fifth Assessment Synthesis Report - Climate Change 2014 Synthesis Report, Intergovernmental Panel on Climate Change (IPCC), [http://www.ipcc.ch/pdf/assessment-report/ar5/syr/SYR\\_AR5\\_LONGERREPORT.pdf](http://www.ipcc.ch/pdf/assessment-report/ar5/syr/SYR_AR5_LONGERREPORT.pdf), 2014.
- Arnold, L.: *Random Dynamical Systems*, Springer, 1998.
- Bell, T. L.: Climate Sensitivity from Fluctuation Dissipation: Some Simple Model Tests, *Journal of the Atmospheric Sciences*, 37, 1700–1707, [https://doi.org/10.1175/1520-0469\(1980\)037<1700:CSFFDS>2.0.CO;2](https://doi.org/10.1175/1520-0469(1980)037<1700:CSFFDS>2.0.CO;2), 1980.
- Bódai, T. and Tél, T.: Annual variability in a conceptual climate model: Snapshot attractors, hysteresis in extreme events, and climate sensitivity, *Chaos: An Interdisciplinary Journal of Nonlinear Science*, 22, 023 110, <https://doi.org/10.1063/1.3697984>, 2012.
- Boschi, R., Lucarini, V., and Pascale, S.: Bistability of the climate around the habitable zone: A thermodynamic investigation, *Icarus*, 226, 1724 – 1742, <https://doi.org/http://dx.doi.org/10.1016/j.icarus.2013.03.017>, 2013.
- Caldeira, K. and Myhrvold, N. P.: Projections of the pace of warming following an abrupt increase in atmospheric carbon dioxide concentration, *Environmental Research Letters*, 8, 034 039, <http://stacks.iop.org/1748-9326/8/i=3/a=034039>, 2013.
- Carvalho, A., Langa, J. A., and Robinson, J.: *Attractors for infinite-dimensional non-autonomous dynamical systems*, Springer, 2013.
- Chekroun, M. D., Simonnet, E., and Ghil, M.: Stochastic climate dynamics: Random attractors and time-dependent invariant measures, *Physica D: Nonlinear Phenomena*, 240, 1685 – 1700, <https://doi.org/http://dx.doi.org/10.1016/j.physd.2011.06.005>, 2011.
- Cionni, I., Visconti, G., and Sassi, F.: Fluctuation dissipation theorem in a general circulation model, *Geophysical Research Letters*, 31, <https://doi.org/10.1029/2004GL019739>, 109206, 2004.
- Conway, E.: What's in a Name? Global Warming vs. Climate Change, NASA, [https://www.nasa.gov/topics/earth/features/climate\\_by\\_any\\_other\\_name.html](https://www.nasa.gov/topics/earth/features/climate_by_any_other_name.html), 5 December 2008.
- Cooper, F. C., Esler, J. G., and Haynes, P. H.: Estimation of the local response to a forcing in a high dimensional system using the fluctuation-dissipation theorem, *Nonlinear Processes in Geophysics*, 20, 239–248, <https://doi.org/10.5194/npg-20-239-2013>, 2013.
- Crauel, H. and Flandoli, F.: Attractors for random dynamical systems, *Probability Theory and Related Fields*, 100, 365–393, <https://doi.org/10.1007/BF01193705>, 1994.
- Crauel, H., Debussche, A., and Flandoli, F.: Random attractors, *Journal of Dynamics and Differential Equations*, 9, 307–341, <https://doi.org/10.1007/BF02219225>, 1997.
- Drótos, G., Bódai, T., and Tél, T.: Probabilistic Concepts in a Changing Climate: A Snapshot Attractor Picture, *Journal of Climate*, 28, 3275–3288, <https://doi.org/10.1175/JCLI-D-14-00459.1>, 2015.

- Drótos, G., Bódai, T., and Tél, T.: Quantifying nonergodicity in nonautonomous dissipative dynamical systems: An application to climate change, *Phys. Rev. E*, 94, 022 214, <https://doi.org/10.1103/PhysRevE.94.022214>, 2016.
- Ferraro, A. J., Highwood, E. J., and Charlton-Perez, A. J.: Weakened tropical circulation and reduced precipitation in response to geoengineering, *Environmental Research Letters*, 9, 014 001, <http://stacks.iop.org/1748-9326/9/i=1/a=014001>, 2014.
- 5 Fraedrich, K.: A suite of user-friendly global climate models: Hysteresis experiments, *The European Physical Journal Plus*, 127, 1–9, <https://doi.org/10.1140/epjp/i2012-12053-7>, 2012.
- Good, P., Lowe, J. A., Andrews, T., Wiltshire, A., Chadwick, R., Ridley, J. K., Menary, M. B., Bouttes, N., Dufresne, J. L., Gregory, J. M., Schaller, N., and Shiogama, H.: Nonlinear regional warming with increasing CO<sub>2</sub> concentrations, *Nature Climate Change*, 5, 138 EP –, <http://dx.doi.org/10.1038/nclimate2498>, 2015.
- 10 Good, P., Andrews, T., Chadwick, R., Dufresne, J.-L., Gregory, J. M., Lowe, J. A., Schaller, N., and Shiogama, H.: nonlinMIP contribution to CMIP6: model intercomparison project for non-linear mechanisms: physical basis, experimental design and analysis principles (v1.0), *Geoscientific Model Development*, 9, 4019–4028, <https://doi.org/10.5194/gmd-9-4019-2016>, 2016.
- Gritsun, A. and Branstator, G.: Climate Response Using a Three-Dimensional Operator Based on the Fluctuation–Dissipation Theorem, *Journal of the Atmospheric Sciences*, 64, 2558–2575, <https://doi.org/10.1175/JAS3943.1>, 2007.
- 15 Gritsun, A. and Lucarini, V.: Fluctuations, response, and resonances in a simple atmospheric model, *Physica D: Nonlinear Phenomena*, 349, 62 – 76, <https://doi.org/http://dx.doi.org/10.1016/j.physd.2017.02.015>, 2017.
- Hansen, J., Sato, M., Ruedy, R., Nazarenko, L., Lacis, A., Schmidt, G. A., Russell, G., Aleinov, I., Bauer, M., Bauer, S., Bell, N., Cairns, B., Canuto, V., Chandler, M., Cheng, Y., Genio, A. D., Faluvegi, G., Fleming, E., Friend, A., Hall, T., Jackman, C., Kelley, M., Kiang, N., Koch, D., Lean, J., Lerner, J., Lo, K., Menon, S., Miller, R., Minnis, P., Novakov, T., Oinas, V., Perlwitz, J., Perlwitz, J., Rind, D., Romanou, A., Shindell, D., Stone, P., Sun, S., Tausnev, N., Thresher, D., Wielicki, B., Wong, T., Yao, M., and Zhang, S.: Efficacy of climate forcings, *Journal of Geophysical Research: Atmospheres*, 110, <https://doi.org/10.1029/2005JD005776>, 2005.
- 20 Herein, M., Márffy, J., Drótos, G., and Tél, T.: Probabilistic Concepts in Intermediate-Complexity Climate Models: A Snapshot Attractor Picture, *Journal of Climate*, 29, 259–272, <https://doi.org/10.1175/JCLI-D-15-0353.1>, 2015.
- Herein, M., Drótos, G., Haszpra, T., Márffy, J., and Tél, T.: The theory of parallel climate realizations as a new framework for teleconnection analysis, *Scientific Reports*, 7, 44 529 EP –, <http://dx.doi.org/10.1038/srep44529>, article, 2017.
- 25 Hespanha, J. P.: *Linear System Theory*, Princeton University Press, 2009.
- Huang, Y. and Bani Shahabadi, M.: Why logarithmic? A note on the dependence of radiative forcing on gas concentration, *Journal of Geophysical Research: Atmospheres*, 119, 13,683–13,689, <https://doi.org/10.1002/2014JD022466>, 2014JD022466, 2014.
- Katznelson, Y.: *An Introduction to Harmonic Analysis*, Dover, 1976.
- 30 Kirk-Davidoff, D. B.: On the diagnosis of climate sensitivity using observations of fluctuations, *Atmospheric Chemistry and Physics*, 9, 813–822, <https://doi.org/10.5194/acp-9-813-2009>, 2009.
- Kloeden, P. E. and Rasmussen, M.: *Nonautonomous Dynamical Systems*, vol. 176 of *Mathematical Surveys and Monographs*, AMS, 2011.
- Kravitz, B., Robock, A., Boucher, O., Schmidt, H., Taylor, K. E., Stenchikov, G., and Schulz, M.: The Geoengineering Model Intercomparison Project (GeoMIP), *Atmospheric Science Letters*, 12, 162–167, <https://doi.org/10.1002/asl.316>, <https://rmets.onlinelibrary.wiley.com/doi/abs/10.1002/asl.316>, 2011.
- 35 Kravitz, B., Forster, P. M., Jones, A., Robock, A., Alterskjær, K., Boucher, O., Jenkins, A. K. L., Korhonen, H., Kristjánsson, Jón, E., Muri, H., Niemeier, U., Partanen, A.-I., Rasch, P. J., Wang, H., and Watanabe, S.: Sea spray geoengineering experiments in the geoengineering

- model intercomparison project (GeoMIP): Experimental design and preliminary results, *Journal of Geophysical Research: Atmospheres*, 118, 11,175–11,186, <https://doi.org/10.1002/jgrd.50856>, <https://agupubs.onlinelibrary.wiley.com/doi/abs/10.1002/jgrd.50856>, 2013.
- Kravitz, B., MacMartin, D. G., Wang, H., and Rasch, P. J.: Geoengineering as a design problem, *Earth System Dynamics*, 7, 469–497, <https://doi.org/10.5194/esd-7-469-2016>, <https://www.earth-syst-dynam.net/7/469/2016/>, 2016.
- 5 Kubo, R.: The fluctuation-dissipation theorem, *Reports on Progress in Physics*, 29, 255, <http://stacks.iop.org/0034-4885/29/i=1/a=306>, 1966.
- Leith, C. E.: Climate Response and Fluctuation Dissipation, *Journal of the Atmospheric Sciences*, 32, 2022–2026, [https://doi.org/10.1175/1520-0469\(1975\)032<2022:CRAFD>2.0.CO;2](https://doi.org/10.1175/1520-0469(1975)032<2022:CRAFD>2.0.CO;2), 1975.
- Lenton, T. and Vaughan, N.: *Geoengineering Responses to Climate Change*, Springer-Verlag, 2013.
- Lucarini, V.: *Modelling Complexity: the case of Climate Science*, arXiv:1106.1265, 2013.
- 10 Lucarini, V. and Sarno, S.: A statistical mechanical approach for the computation of the climatic response to general forcings, *Nonlinear Processes in Geophysics*, 18, 7–28, <https://doi.org/10.5194/npg-18-7-2011>, 2011.
- Lucarini, V., Ragone, F., and Lunkeit, F.: Predicting Climate Change Using Response Theory: Global Averages and Spatial Patterns, *Journal of Statistical Physics*, 166, 1036–1064, <https://doi.org/10.1007/s10955-016-1506-z>, 2017.
- MacMartin, D. G. and Kravitz, B.: Dynamic climate emulators for solar geoengineering, *Atmospheric Chemistry and Physics*, 16, 15 789–15 799, <https://doi.org/10.5194/acp-16-15789-2016>, <https://www.atmos-chem-phys.net/16/15789/2016/>, 2016.
- 15 MacMartin, D. G., Caldeira, K., and Keith, D. W.: Solar geoengineering to limit the rate of temperature change, *Philosophical Transactions of the Royal Society of London A: Mathematical, Physical and Engineering Sciences*, 372, <https://doi.org/10.1098/rsta.2014.0134>, <http://rsta.royalsocietypublishing.org/content/372/2031/20140134>, 2014a.
- MacMartin, D. G., Kravitz, B., and Keith, D. W.: Geoengineering: The world’s largest control problem, in: *2014 American Control Conference*, pp. 2401–2406, <https://doi.org/10.1109/ACC.2014.6858658>, 2014b.
- 20 MacMartin, D. G., Kravitz, B., Keith, D. W., and Jarvis, A.: Dynamics of the coupled human–climate system resulting from closed-loop control of solar geoengineering, *Climate Dynamics*, 43, 243–258, <https://doi.org/10.1007/s00382-013-1822-9>, 2014c.
- MacMartin, D. G., Ricke, K. L., and Keith, D. W.: Solar geoengineering as part of an overall strategy for meeting the 1.5°C Paris target, *Philosophical Transactions of the Royal Society of London A: Mathematical, Physical and Engineering Sciences*, 376, <https://doi.org/10.1098/rsta.2016.0454>, <http://rsta.royalsocietypublishing.org/content/376/2119/20160454>, 2018.
- 25 MacMynowski, D. G., Shin, H.-J., and Caldeira, K.: The frequency response of temperature and precipitation in a climate model, *Geophysical Research Letters*, 38, <https://doi.org/10.1029/2011GL048623>, <https://agupubs.onlinelibrary.wiley.com/doi/abs/10.1029/2011GL048623>, 2011.
- Majda, A. J., Gershgorin, B., and Yuan, Y.: Low-Frequency Climate Response and Fluctuation-Dissipation Theorems: Theory and Practice, *Journal of the Atmospheric Sciences*, 67, 1186–1201, <https://doi.org/10.1175/2009JAS3264.1>, 2010.
- 30 Merlis, T. M., Held, I. M., Stenchikov, G. L., Zeng, F., and Horowitz, L. W.: Constraining Transient Climate Sensitivity Using Coupled Climate Model Simulations of Volcanic Eruptions, *Journal of Climate*, 27, 7781–7795, <https://doi.org/10.1175/JCLI-D-14-00214.1>, <https://doi.org/10.1175/JCLI-D-14-00214.1>, 2014.
- National Research Council: *Climate Intervention: Carbon Dioxide Removal and Reliable Sequestration*, <https://doi.org/10.17226/18805>, a.
- 35 National Research Council: *Climate Intervention: Reflecting Sunlight to Cool Earth*, <https://doi.org/10.17226/18988>, b.
- Nicolis, C., Boon, J. P., and Nicolis, G.: Fluctuation-dissipation theorem and intrinsic stochasticity of climate, *Il Nuovo Cimento C*, 8, 223–242, <https://doi.org/10.1007/BF02574709>, 1985.

- Ragone, F., Lucarini, V., and Lunkeit, F.: A new framework for climate sensitivity and prediction: A modelling perspective, *Climate Dynamics*, 46, 1459–1471, <https://doi.org/10.1007/s00382-015-2657-3>, 2016.
- Ricke, K. L., Morgan, M. G., and Allen, M. R.: Regional climate response to solar-radiation management, *Nature Geoscience*, 3, 537–541, 2010.
- 5 Ricke, K. L., Rowlands, D. J., Ingram, W. J., Keith, D. W., and Morgan, M. G.: Effectiveness of stratospheric solar-radiation management as a function of climate sensitivity, *Nature Climate Change*, 2, 92–96, 2012.
- Risken, H.: *The Fokker-Planck equation*, Springer, 1996.
- Romeiras, F. J., Grebogi, C., and Ott, E.: Multifractal properties of snapshot attractors of random maps, *Phys. Rev. A*, 41, 784–799, <https://doi.org/10.1103/PhysRevA.41.784>, 1990.
- 10 Ruelle, D.: A review of linear response theory for general differentiable dynamical systems, *Nonlinearity*, 22, 855, <http://stacks.iop.org/0951-7715/22/i=4/a=009>, 2009.
- Sell, G. R.: Nonautonomous Differential Equations and Topological Dynamics. I. The Basic Theory, *Transactions of the American Mathematical Society*, 127, 241–262, <http://www.jstor.org/stable/1994645>, 1967a.
- Sell, G. R.: Nonautonomous Differential Equations and Topological Dynamics. II. Limiting Equations, *Transactions of the American Mathematical Society*, 127, 263–283, <http://www.jstor.org/stable/1994646>, 1967b.
- 15 Tornqvist, L., Vartia, P., and Vartia, Y. O.: How Should Relative Changes Be Measured?, *The American Statistician*, 39, 43–46, <http://www.jstor.org/stable/2683905>, 1985.
- Winton, M.: Sea Ice–Albedo Feedback and Nonlinear Arctic Climate Change, pp. 111–131, American Geophysical Union (AGU), <https://doi.org/10.1029/180GM09>, <https://agupubs.onlinelibrary.wiley.com/doi/abs/10.1029/180GM09>, 2013.
